# 1 High-throughput antibody engineering in mammalian cells by 2 CRISPR/Cas9-mediated homology-directed mutagenesis

3 Derek M Mason<sup>1</sup>, Cédric R Weber<sup>1</sup>, Cristina Parola<sup>1,2</sup>, Simon M Meng<sup>1</sup>, Victor Greiff<sup>1,3</sup>,  
4 William J Kelton<sup>1</sup> & Sai T Reddy<sup>1,\*</sup>

5 <sup>1</sup> Department of Biosystems Science and Engineering, ETH Zürich, Basel 4058, Switzerland

6 <sup>2</sup> Life Science Graduate School, Systems Biology, ETH Zürich, University of Zurich, Zurich 8057,  
7 Switzerland

8 <sup>3</sup> current address: Department of Immunology, University of Oslo, Oslo 0372, Norway

9 \*To whom correspondence should be addressed. Tel: +41 61 387 33 68; Email: sai.reddy@ethz.ch

10

## 11 ABSTRACT

12 Antibody engineering is performed to improve therapeutic properties by directed evolution,  
13 usually by high-throughput screening of phage or yeast display libraries. Engineering  
14 antibodies in mammalian cells offers advantages associated with expression in their final  
15 therapeutic format (full-length glycosylated IgG), however, the inability to express large and  
16 diverse libraries severely limits their potential throughput. To address this limitation, we have  
17 developed homology-directed mutagenesis (HDM), a novel method which extends the concept  
18 of CRISPR/Cas9-mediated homology-directed repair (HDR). HDM leverages oligonucleotides  
19 with degenerate codons to generate site-directed mutagenesis libraries in mammalian cells. By  
20 improving HDM efficiency (>35-fold) and combining mammalian display screening with next-  
21 generation sequencing (NGS), we validated this approach can be used for key applications in  
22 antibody engineering at high-throughput: rational library construction, novel variant discovery,  
23 affinity maturation, and deep mutational scanning (DMS). We anticipate that HDM will be a  
24 valuable tool for engineering and optimizing antibodies in mammalian cells, and eventually  
25 enable directed evolution of other complex proteins and cellular therapeutics.

## 26 INTRODUCTION

27 Following their initial discovery, antibody drug candidates typically require further engineering to  
28 increase target affinity or improve a number of other characteristics associated with therapeutic  
29 developability (e.g., immunogenicity, stability, solubility)<sup>1</sup>. This is independent of the original source of  
30 the antibody (i.e., immunized animals, recombinant or synthetic libraries)<sup>2</sup>. Even with a lead candidate  
31 to start from, the potential protein sequence space to explore and optimize for all the relevant drug  
32 parameters expands astronomically. Therefore, antibody engineering is done at high-throughput by  
33 library mutagenesis and directed evolution using surface display screening, most notably phage and  
34 yeast display<sup>3-6</sup>. With some exceptions<sup>7,8</sup>, these display systems typically express antibody proteins as  
35 fragments [e.g., single-chain fragment variable (scFv) and fragment antigen binding (Fab)] and without  
36 certain post-translational modifications (i.e., glycosylation). However, for therapeutic production, scFvs  
37 and Fabs require conversion into full-length glycosylated IgG molecules which consequentially leads to  
38 a final optimization phase of evaluating and modifying drug candidates directly in mammalian cells. This  
39 step is performed at low-throughput due to the challenges associated with generating libraries in  
40 mammalian systems (i.e., inability to stably retain and replicate plasmids).

41 When engineering candidate antibodies, libraries are often constructed by PCR mutagenesis (e.g.,  
42 error-prone PCR and site-directed mutagenesis with degenerate primers), followed by cloning into  
43 expression plasmids, making them compatible for screening by phage and yeast display. With the  
44 motivation of being able to screen antibodies in their native context as full-length IgGs with proper  
45 glycosylation, attempts have also been made to incorporate libraries into mammalian cells using  
46 episomal-, viral-, or transposon-mediated gene transfer<sup>9-11</sup>. However, relative to phage ( $>10^{10}$ ) and  
47 yeast ( $>10^7$ ), these mammalian display systems are substantially challenged by small library size ( $\sim 10^4$   
48 variants for genome-integrated libraries) and polyclonality (multiple antibody variants per cell).  
49 Therefore, in order to truly have a competitive platform for mammalian antibody engineering, an  
50 alternative method which overcomes these limitations is essential.

51 With the rapid advancements in genome editing technologies, most notably the CRISPR/Cas9 system  
52 (Cas9), it is now possible to easily make targeted genomic modifications in mammalian cells<sup>12</sup>. While  
53 Cas9 is most widely used for gene knock-out (via non-homologous end joining, NHEJ) or gene knock-  
54 in (via HDR), it also enables the generation of libraries in mammalian cells. For example, Cas9 has  
55 been used to promote HDR with degenerate templates, resulting in a library of genomic variants; this  
56 has been applied to both coding and non-coding regions, providing insight into gene regulation,  
57 expression, and even drug resistance<sup>13,14</sup>. In a recent study, Cas9 was also used to integrate a genomic  
58 landing pad containing a recombination site, which allowed for the introduction of a library of transgene  
59 variants<sup>15</sup>. Although these studies illustrate the potential to integrate libraries into specific genomic  
60 regions of mammalian cells, transfection of genome editing reagents combined with low HDR  
61 efficiencies limit the scalability and ease-of-use required to generate libraries capable of exploring  
62 sufficient protein sequence space, which is crucial for directed evolution and protein engineering.

63 In this study, we have established the method of HDM, which relies on high-efficiency HDR by Cas9 to  
64 generate site-directed mutagenesis libraries in mammalian cells. We use as our mammalian antibody  
65 display platform, a recently developed hybridoma cell line, where antibody variable regions can be  
66 exchanged by Cas9-driven HDR, referred to as plug-and-(dis)play hybridomas (PnP)<sup>16</sup>. A critical feature  
67 of our HDM method is that it utilizes single-stranded oligonucleotides (ssODNs) as the donor template,  
68 which relative to double-stranded DNA, drastically increase HDR integration efficiencies<sup>17-19</sup> and also  
69 reduce off-target integration events<sup>20,21</sup>. By using a cellular genotype-phenotype assay, we optimized a  
70 series of parameters, allowing us to achieve a nearly  $\sim 35$ -fold improvement of HDR efficiency. Next,  
71 starting with an antibody specific for a model antigen, we introduce a library into the variable heavy  
72 chain ( $V_H$ ) complementarity determining region 3 (CDRH3) by using ssODN templates with commonly  
73 used NNK and NNB degenerate codon regions. Following HDM, we perform NGS on the entire  $V_H$   
74 region to quantitatively assess the library diversity and distribution. We further maximize the efficacy of  
75 HDM libraries by implementing an optimized gRNA target sequence and rationally selecting degenerate  
76 nucleotides to match target amino acid (a.a.) frequencies of CDRH3 regions found in the antibody  
77 repertoire of murine naïve B cells<sup>22,23</sup>. With HDM, we were able to achieve a library size of  $>10^5$  variants  
78 validated by NGS. We then screen this library for specificity towards our model antigen, which led to  
79 recovery of a novel variant with a unique CDRH3. We also show that by using HDM to generate  
80 saturation libraries across the CDRH3, we could perform directed evolution and affinity maturation.

81 Finally, we apply HDM to the recently established method of DMS<sup>24,25</sup>, which allowed us to deconstruct  
82 the antigen-binding sequence landscape of our antigen-specific antibodies. Through HDM we have  
83 successfully developed a rapid and facile method for the generation of site-directed mutagenesis  
84 libraries in mammalian cells, which represents a versatile approach for high-throughput antibody  
85 engineering.

## 86 RESULTS

### 87 Optimizing HDM efficiency

88 The degree of genetic diversity and library size that can be introduced using Cas9 is dependent on HDR  
89 efficiency. Previously, when establishing our PnP hybridoma platform, we observed an HDR efficiency  
90 of less than 1.0% when exchanging a fluorescent reporter protein with antibody variable regions  
91 encoded on a double-stranded DNA cassette (~1.5 kb donor regions, ~0.7 kb each for left and right  
92 homology arms)<sup>16</sup>. Previous studies have shown that despite having only (micro)homology arms, much  
93 higher HDR efficiencies are observed when using ssODN donor templates<sup>17,26,27</sup>. Due to the length  
94 limitation of commercially synthesized ssODNs, the target region of mutation is typically 50-80  
95 nucleotides (nt), with ~50 nt for each homology arm, which is highly compatible for targeting antibody  
96 CDRs for mutagenesis. However, in contrast to the previous approach, where loss of reporter protein  
97 and gain of antibody expression could easily be used to detect HDR, detection of HDR with ssODNs  
98 templates is more challenging. Therefore, to quantify and subsequently optimize ssODN-based HDR,  
99 we first developed a cellular phenotype assay based on antibody expression and antigen binding.

100 Starting with the PnP-HEL23 hybridoma cell line, which expresses a murine antibody sequence with  
101 specificity towards the model antigen hen egg lysozyme antigen (HEL)<sup>16</sup>, we used Cas9 and guide RNA  
102 (gRNA) targeting CDRH3 to introduce a frameshift mutation by NHEJ, resulting in the knockout of  
103 antibody expression (PnP-HEL23.FI cell line) (**Fig. 1a**). We then designed an ssODN template that  
104 encoded the original CDRH3 a.a. but contained silent mutations, thus Cas9-driven HDR could be  
105 detected if both antibody expression and specificity for target antigen HEL were restored. If only  
106 antibody expression was detected without binding to HEL, we presumed that an insertion/deletion  
107 (indel) via NHEJ or micro-homology mediated end joining (MMEJ) had occurred that knocked the  
108 antibody sequence back in-frame. Editing efficiencies were measured by flow cytometry following  
109 labelling of cells with fluorescently-tagged HEL and anti-IgH (**Fig. 1b**).

110 To maximize HDR efficiency in PnP cells, several parameters regarding Cas9, gRNA, and donor  
111 templates were evaluated by performing separate and parallel transfections ( $2 \times 10^5$  cells). To resolve  
112 the effect of homology arm length on HDR, ssODNs ranged between 60 and 200 nt. To determine if an  
113 increase in resistance to nuclease degradation of ssODNs improves HDR, we included  
114 phosphorothioate (PS) bonds in the 5' and 3' ends. Cas9 and gRNA was delivered to cells by  
115 transfection (electroporation) with either plasmid or ribonucleoprotein (RNP) complexes<sup>18,28</sup>. We also  
116 generated a PnP stable cell line which constitutively expresses Cas9 from the Rosa26 safe harbor locus  
117 (**Supplementary Fig. 1**), as it permits the transfection of just pre-formed guide RNA (gRNA) and ssODN  
118 donor (constant expression of Cas9 has been shown to have no toxic side effects on cells or *in vivo*<sup>29</sup>).  
119 Across all conditions, we observed the most notable increase in HDR efficiency when using the

120 constitutive Cas9-expressing cell line, thus all subsequent experiments were performed with  
121 constitutive Cas9 expression (**Fig. 1c, Supplementary Fig. 2**). The highest HDR efficiency of 26% was  
122 observed when ssODNs with PS modifications and 120 nt length (homology arms equal to 46 nt). This  
123 HDR rate remained stable when scaling up the number of cells transfected and only decreased slightly  
124 to ~20% following transfection of  $1 \times 10^7$  cells (**Supplementary Fig. 3**). Recently, it has been shown  
125 that HDR efficiency can be improved by inhibiting the DNA repair regulator protein 53BP1, which  
126 promotes NHEJ over HDR<sup>30,31</sup>. Therefore, we used a gRNA to target and knockout 53BP1 in our Cas9-  
127 expressing cell line; whereby subsequent testing of HDR in these cells showed an improved HDR  
128 efficiency of ~36% (120 nt and PS-modified ssODNs), a >35-fold improvement relative to 1% (120 nt,  
129 Cas9 plasmid, unmodified ssODNs) (**Fig. 1d**).

### 130 **Assessing HDM library diversity and eliminating bias by gRNA design**

131 Targeting the CDRs for site-directed mutagenesis has proven to be an effective means of building  
132 antibody libraries for improved properties<sup>32,33</sup>. Introducing sequence diversity into CDRH3 alone has  
133 shown to be sufficient for a wide range of antigen-binding specificities<sup>34</sup>. Thus, initial libraries were  
134 generated using ssODN homology templates (126 nt) that contained nine consecutive degenerate  
135 codons of NNK or NNB within the 14 a.a. long CDRH3 (e.g, 'CAR(NNK)<sub>9</sub>YW'). These degenerate  
136 ssODN donors were transfected with gRNA into PnP-HEL23.FI cells ( $2 \times 10^5$  cells, two replicates per  
137 codon scheme). Here, we define the difference between HDR and HDM, in that the latter uses ssODN  
138 templates with degenerate codons. In order to precisely quantify library diversity introduced by HDM,  
139 following transfection and cell recovery and expansion, genomic DNA was isolated and targeted PCR  
140 was performed on the V<sub>H</sub> region to amplify libraries for NGS (using a previously established protocol for  
141 Illumina paired-end sequencing)<sup>35</sup>. Across the four samples of NNK and NNB libraries, sequencing  
142 depth ranged between 577,915 – 847,687 read counts, with a ~95% alignment success, resulting in  
143 12,773 -14,842 unique CDRH3 a.a. sequences (**Supplementary Table 1**). CDRH3 sequences with a  
144 length of 14 a.a. were classified as HDM events. Analysis of the HDM sequences revealed nearly an  
145 unbiased a.a. usage: positional a.a. usage in HDM libraries was nearly identical to what is theoretically  
146 predicted using NNK/B codon scheme (mean-squared error (MSE) =  $3.07 \pm 0.32$ ) (**Fig. 2a**). Furthermore,  
147 overlap analysis of sequences revealed almost no common CDRH3 sequences across all replicates,  
148 indicating that each HDM experiment results in a unique library (**Supplementary Table 2**).

149 In addition to HDM, a subpopulation of cells can restore antibody expression through NHEJ or MMEJ.  
150 Consistent with previous reports<sup>36</sup>, we observed that the non-randomness of these pathways created a  
151 bias in the library: there were several grossly overrepresented variants (**Fig. 2c**). This presence of high-  
152 frequency, redundant variants may limit library diversity and impede screening and selection steps. In  
153 order to address this issue, we used the information from the highest frequency NHEJ or MMEJ events  
154 to rationally design a gRNA target sequence which would promote either a frameshift mutation or in-  
155 frame stop codon following Cas9 cleavage and DNA repair. Using this approach, we drastically reduced  
156 the probability that an NHEJ or MMEJ event would result in a functionally expressed antibody by  
157 ensuring in-frame stop codons would appear on the 5' and 3' sides of the cleavage site (**Fig. 2b**). Next,  
158 we used this new, frameshift-stop cell line (PnP-HEL23.FS) to generate HDM libraries, using once again

159 NNK/B ssODN templates. NGS on  $V_H$  genes was performed as before and similar sequencing depth  
160 and quality was obtained (**Supplementary Table 1**). Close analysis of the CDRH3 distribution revealed  
161 a substantial decrease in the frequencies of overrepresented (biased) variants and the generation of a  
162 more desirable uniformly diverse library. Diversity was quantified using the Hill diversity (**Fig. 2d**,  
163 *Equation 2*)<sup>37</sup>, where the diversity ( ${}^{\alpha}D$ ) for each alpha value represents an equivalent library in which all  
164 variants are equally present; Shannon diversity (alpha =1) and Simpson's index (alpha = 2) are widely  
165 used for diversity comparisons.

### 166 **Design, generation, and analysis of an HDM library that mimics the naïve antibody repertoire**

167 While we have shown that with optimized parameters we can achieve considerable HDM efficiency, the  
168 growth rate and number of mammalian cells that can be handled in a typical experiment still pose  
169 challenges in achieving large library sizes ( $>10^5$ ). With this in mind, we looked to maximize the  
170 functional quality of HDM libraries through the rational selection of degenerate codons. A major  
171 limitation in standard NNK/B codon schemes is the compounding probability of introducing a premature  
172 stop codon as the number of degenerate codons increases (**Supplementary Fig. 4a**). However, when  
173 considering every possible combination of nucleotides, there exist 3,375 different degenerate codon  
174 schemes. Thus, as a first approach towards optimizing ssODNs, we designed degenerate codons that  
175 would most closely mimic the CDRH3 a.a. frequencies found in the antibody repertoire of murine naïve  
176 B cells (433,618 unique CDHR3 sequences)<sup>23</sup> (**Fig. 3a**). It is well established that CDRH3 libraries with  
177 a more natural sequence landscape offer favorable properties (i.e., reduced immunogenicity, improved  
178 protein stability and folding)<sup>38</sup>. Therefore, to generate the naïve repertoire optimized (NRO) library, for  
179 each position the degenerate codon was selected that produced the minimal MSE value relative to the  
180 naïve repertoire, while also using weights to punish degenerate codons that result in cysteines or stop  
181 codons (*Equation 1*). Following HDM and NGS, we observed that relative to the naïve repertoire, NRO  
182 libraries had substantially lower MSE values (a.a. length 14, average MSE = 47.1) compared to that of  
183 NNK/B libraries (a.a. length 14, average MSE =  $85.7 \pm 0.85$ ) (**Fig. 3b**). Notably, the possibility of  
184 introducing a premature stop codon or cysteine residue was eliminated while still maintaining adequate  
185 levels of total diversity (**Supplementary Fig. 4b**). Using another indication of sequence similarity, we  
186 determined based on the Levenshtein (edit) distance that the NRO library had much higher percentage  
187 of sequences with short edit distances compared to NNK/B libraries (**Fig. 3c**).

188 The CDRH3 length distribution of natural antibody repertoires also represents another important aspect  
189 to recapitulating functional diversity. Therefore, in order to assess the impact of CDRH3 length on HDM  
190 efficiency, separate transfections of  $2 \times 10^5$  cells were performed with ssODN donors containing various  
191 lengths of degenerate codon regions, while keeping homology regions constant. As hypothesized, a  
192 minor decrease in integration efficiency was observed as the a.a. degenerate region increases  
193 (**Supplementary Fig. 5**). This relationship between degenerate codon region length and integration  
194 efficiency can be taken into consideration when building libraries that aim to resemble the natural  
195 CDRH3 length distribution.

196 Next, by combining the previously acquired knowledge, an HDM library of unique CDRH3 sequences  
197 was constructed by transfecting  $10^7$  cells with gRNA and a pool of NRO ssODNs with varying

198 degenerate codon lengths, which corresponded to CDRH3 lengths of 10, 12, 14, 15, 16, 18, 20, 22 a.a.,  
199 thus mimicking the diversity and length distribution found in naïve repertoires. The ssODNs were pooled  
200 to mimic the naïve repertoire length distribution at weight-adjusted ratios to account for the expected  
201 decrease in integration efficiencies for longer degenerate regions. Following transfection, cells were  
202 allowed to divide for >72 hours in order to reach a total cell count >10<sup>8</sup> cells, at which point antibody  
203 expressing cells (Ab+) were labelled with biotinylated anti-IgH and isolated using magnetic assisted cell  
204 sorting (MACS). NGS libraries were prepared from genomic DNA isolated from cells pre- and post-  
205 selection of antibody expression. Since the number of cells transfected was scaled up, NGS sequencing  
206 depth was correspondingly increased to 5.1 x 10<sup>6</sup> and 1.4 x 10<sup>6</sup> reads for pre- and post-selection  
207 libraries, respectively, with a ~94% alignment success (**Supplementary Table 1**). Analysis of the NGS  
208 data revealed exceptional agreement between the theoretically predicted and observed a.a.  
209 frequencies across all CDRH3 lengths (MSE = 2.95±1.14) (**Fig. 3b**). Furthermore, the observed CDRH3  
210 length distribution recapitulated what is observed in naïve repertoires (**Fig. 3d**). There were 9.9x10<sup>4</sup>  
211 and 1.47x10<sup>5</sup> unique CDRH3 sequences identified in the samples pre- and post-selection of Ab+ cells,  
212 respectively. A possible explanation for this inconsistency can be attributed to undersampling due to  
213 genomic DNA, where copy numbers of a given sequence are expectedly low.

#### 214 **Antibody screening and affinity maturation with HDM libraries**

215 The HDM library described in the previous section was next used for antibody discovery using a directed  
216 evolution and high-throughput screening approach. Most recombinant antibody libraries, not derived  
217 from an immunized animal, require substantially more diversity than our NRO library in PnP cells (1.47  
218 x 10<sup>5</sup> unique CDRH3s), hence phage and yeast display are often used because of their increased  
219 throughput. In order to compensate for this, we opted to screen our library against the model antigen  
220 HEL; this served as a reasonable proof-of-concept because the rest of the antibody scaffold (excluding  
221 CDRH3) was derived from a HEL-specific sequence (HEL23)<sup>16</sup>. Thus, even with a relatively small  
222 library, we aimed to determine if we could discover antigen-specific variants possessing unique CDRH3  
223 sequences when compared to HEL23. First, we enriched PnP cells from the library by two rounds of  
224 MACS, using a biotinylated-HEL and streptavidin conjugated magnetic beads. For each round of MACS,  
225 the library was expanded to a minimum of 5x10<sup>7</sup> cells in order to contain multiple copies per variant.  
226 Following MACS, a definitive HEL-specific population was visible by flow cytometry (**Fig. 4a**). A  
227 subsequent two rounds of FACS enrichment were then performed, followed by a single-cell sort.  
228 Antigen specificity for the monoclonal populations was verified by flow cytometry (**Fig. 4a**) and ELISA  
229 (**Supplementary Fig. 6**). Genotyping identified a novel clone (HEL24), which had a unique and longer  
230 CDRH3 sequence when compared to the original HEL23 (Levenshtein distance = 8) (**Fig. 4d**).

231 In addition to novel antibody discovery, directed evolution for affinity maturation is also an important  
232 step to engineering antibodies. Thus, we also aimed to demonstrate that HDM could be used to improve  
233 antibody affinity towards existing antigen-binding clones. To increase the affinity of the previously known  
234 HEL23 and newly discovered HEL24 clones, saturation mutagenesis libraries were generated along  
235 the CDRH3: HDM was performed with a pool of ssODNs with a single NNK codon tiled across CDRH3  
236 (**Fig 4b**). Higher affinity variants were then enriched by FACS, where antibody avidity was normalized

237 by simultaneous labelling for IgG surface expression (**Fig. 4c**). Following 1-2 rounds of FACS  
238 enrichment, monoclonal populations were isolated and characterized. PnP cells have the advantage of  
239 simultaneously surface expressing and secreting IgG<sup>16</sup>, therefore ELISAs were performed on these  
240 variants to confirm that they had similar or improved antigen affinity (**Supplementary Fig. 6**).

#### 241 **Antigen specificity-sequence landscapes uncovered by HDM-mediated DMS**

242 DMS is a new method in protein engineering, which combines directed evolution with NGS to assess  
243 the functional impact of mutations across the protein sequence landscape<sup>39,40</sup>. In a typical DMS  
244 experiment with antibodies, saturation mutagenesis is performed on a single position at a time, followed  
245 by screening for functional antibody expression, and then again for antigen binding (**Supplementary**  
246 **Fig. 7**). NGS is performed along the various screening and selection steps, thus providing substantial  
247 insight into sequence-specificity relationships. Because of the need for large libraries and high-  
248 throughput screening, DMS has most often been performed using phage or yeast display systems. With  
249 the ability to generate and screen libraries in our mammalian display system, we therefore aimed to  
250 perform DMS on our HEL23 and HEL24 binding variants. We generated HDM single-position saturation  
251 libraries of CDRH1, CDRH2, and CDRH3 (pooled ssODNs for each CDR, separate transfection for  
252 each CDR). Each CDR library was then first selected on the basis of antibody expression and then  
253 screened for variants that retained binding to antigen. We extracted genomic DNA and NGS was  
254 performed on the V<sub>H</sub> genes of antibody expressing cells at both pre- and post-antigen selection.  
255 Sequencing depth of all libraries ranged from ~215,000 - 890,000 reads, with an alignment success of  
256 >90% (**Supplementary Table 3**). NGS data was analyzed by determining the enrichment ratio (ER) of  
257 each mutant, which was calculated by examining the clonal frequencies between the pre- and post-  
258 antigen selection libraries<sup>39</sup> (*Equation 3*). Heatmaps representing ER data were constructed for each  
259 CDR (**Fig. 5**). Variants with ERs greater than 1 were then normalized per position and transformed into  
260 the corresponding sequence logo plots. These profiles of DMS data clearly show residues critical or  
261 detrimental for antigen binding and others which are more amenable to mutations. For example, in both  
262 HEL23 and HEL24 CDRH3 sequences, there are two a.a. positions confined to single residue to  
263 maintain antigen binding. Also, interestingly, even though HEL23 and HEL24 have identical CDRH1  
264 and CDRH2 sequences, the DMS profiles show substantial variation and dependencies on different  
265 positions and residues. Where all positions along the CDRH1 of HEL23 appear more receptive to  
266 mutations, the stringency of certain residues found along the CDRH1 of HEL24 implies a greater  
267 influence on and contribution to antigen binding.

268

#### 269 **DISCUSSION**

270 Paramount to any directed evolution and protein engineering strategy is the ability to generate  
271 sufficiently sized libraries of variant clones. Since we rely here on Cas9 to introduce libraries directly in  
272 the genome of mammalian cells, we first aimed to optimize a range of parameters associated with HDR  
273 by developing an experimental assay that coupled antibody genotype to phenotype using PnP cells  
274 (**Fig 1a**). This allowed us to evaluate a series of parameters through which we determined constitutive  
275 Cas9 expression within the host cell played the most important role in improving HDR efficiency (**Fig**

276 **1c**). This is likely due to availability and abundance of Cas9 protein already localized within the nucleus  
277 at the time ssODN donors become available for DNA repair. We also resolved the optimal homology  
278 arm length, which unexpectedly did not correspond to the longest ssODN tested (200 nt), but rather to  
279 an intermediate ssODN length of 120 nt. The precise reason why such a decrease in integration occurs  
280 for longer ssODN donors is not known, but it is hypothesized that longer ssODNs are less accessible,  
281 or may even interfere with DNA repair proteins<sup>26</sup> and could also be attributed to a decrease in  
282 transfection efficiency. We also determined that chemical modification of the 5' and 3' ends of ssODNs  
283 with PS bonds led to higher HDR, most likely because they have additional stability and nuclease  
284 resistance. Since several studies have recently shown that inhibition of the NHEJ pathway regulator  
285 53BP1 can improve HDR, we also knocked out 53BP1 and saw an additional improvement in HDR,  
286 reaching a maximum in this study of ~36% (**Fig. 1d**). In the future, it may be possible to further improve  
287 HDR by incorporating additional techniques such as the use of chemically modified gRNAs<sup>41</sup> and  
288 suppression of other NHEJ molecules (e.g., KU70 and DNA ligase IV)<sup>42</sup>, or by exploiting newly  
289 engineered variants of Cas9 or other programmable nucleases (e.g., Cpf1)<sup>43,44</sup>.

290 With parameters optimized for HDR, we next constructed initial HDM libraries targeting CDRH3 through  
291 the incorporation of degenerate codons (NNK and NNB) present between the homology arms of the  
292 ssODN donors. Following HDM and NGS analysis, we were able to quantitatively elucidate that the a.a.  
293 frequencies present in genomic libraries were almost exactly what would have been predicted based  
294 on the degenerate codon scheme (**Fig 2a**). This implies that ssODN sequences that had additional  
295 homology through similarity with the original CDRH3 were not selectively integrated at higher  
296 frequencies, suggesting that HDM is unbiased. NGS analysis did however reveal that repair of double-  
297 stranded breaks via the NHEJ/MMEJ pathways occurred in a non-random manner, resulting in several  
298 highly abundant variants that were disproportionately present in the library (**Fig. 2c**). This phenomenon  
299 of Cas9 repair bias has been reported previously<sup>36</sup>. While the possibility to use the error-prone NHEJ  
300 mechanism to introduce additional mutagenesis in our library could be considered a benefit, as it has  
301 even been used for discovering novel variants of cell signaling pathways<sup>45</sup> and dissecting enhancer  
302 regions<sup>46</sup>; in the context of antibody engineering, the presence of highly redundant variants would have  
303 a detrimental effect on library distribution and screening<sup>47</sup>. Therefore, we reduced the propensity of  
304 these events by using a 'frameshift-stop' gRNA target sequence, where following Cas9-cleavage,  
305 NHEJ/MMEJ events that would normally result in in-frame antibody sequences instead resulted in  
306 antibody sequences with premature stop codons (**Fig. 2b,c**). HDM libraries constructed using this  
307 frameshift-stop gRNA sequence (PnP-HEL23.FS cells) showed a much more uniform distribution, thus  
308 greatly reducing overrepresented variants (**Fig. 2d**). We expect that any future studies that aim to  
309 engineer antibodies (or other proteins) in mammalian cells will benefit from careful design of gRNA  
310 sequences to ensure that NHEJ/MMEJ-biased repair does not compromise library distribution.

311 Even with the improved HDM efficiencies observed here, our mammalian cell libraries ( $10^5$ ) are still  
312 substantially smaller relative to what can be routinely achieved in phage ( $>10^{10}$ ) and yeast ( $>10^7$ )<sup>2</sup>.  
313 While scale-up can partially compensate for this (**Supplementary Fig. 3**), the slower growth rate and  
314 throughput associated with mammalian cell culture necessitates a strategy to maximize the functional  
315 quality of libraries. To this end, we designed ssODNs by rationally selecting degenerate codon schemes



316 to mimic the a.a. frequencies of a particular diversity space, in this instance the naïve repertoire of mice.  
317 Although there are other approaches to build genetic diversity which very closely recapitulate the a.a.  
318 frequencies of a given repertoire (e.g., trinucleotide phosphoramidate-based oligonucleotide  
319 synthesis)<sup>48-51</sup>, these methods are expensive and require sophisticated gene assembly and cloning  
320 strategies. In contrast, HDM relies on commercially synthesizable degenerate codon schemes and  
321 requires no gene assembly or cloning, thus representing substantial savings in time, effort, and cost for  
322 library generation. Furthermore, we have shown that when compared to standard NNK and NNB  
323 degenerate codon schemes, the rationally selected codon schemes of ssODNs were able to more  
324 closely resemble the a.a. frequencies of the mouse naïve repertoire (**Fig. 3a,b**). To generate the NRO  
325 library, we used a very minimal approach of a single degenerate codon ssODN (per CDRH3 length),  
326 however with advances in the large-scale synthesis of oligonucleotide arrays<sup>52</sup>, ssODN pools of custom  
327 defined sequences could be included to generate more precise HDM libraries.

328 Next, we constructed a larger library, based primarily on increasing the number of cells transfected.  
329 Following HDM and NGS analysis, we identified that there was a minimum of  $1.47 \times 10^5$  variants (unique  
330 CDRH3 a.a. sequences). Due to the fact that samples were prepared for NGS from genomic DNA with  
331 low copy numbers per variant, we believe the library size generated was actually in the range of  $5 \times 10^5$   
332 variants according to live cell counts post-transfection and flow cytometry data. Subjecting the library  
333 to antigen selection by MACS and FACS resulted in the discovery of a novel CDRH3 sequence  
334 (HEL24), which had a different length and large edit distance from the original sequence (HEL23). While  
335 our mammalian cell screening was successful at identifying a single new antigen-specific CDRH3  
336 variant, we understand that such an approach is not in itself competitive with more robust synthetic  
337 antibody libraries screened by phage and yeast display, which often recover panels of unique CDRH3  
338 clones<sup>3,32,33,53</sup>. This is most assuredly due to lower library size and diversity in our mammalian system.  
339 Thus, we don't envision our approach will have a major role in the discovery of novel antibody clones,  
340 but rather we expect the main application will for engineering and optimizing antibodies, starting from a  
341 suitable lead candidate (which can be from *in vivo* selection or phage and yeast display screening). To  
342 this end, we showed that by pooling ssODNs with degenerate codons tiled along the CDRH3, that HDM  
343 could be used to rapidly engineer our "lead candidate" HEL23 and HEL24 antibodies for higher affinity  
344 (**Fig. 4c,d, Supplementary Fig. 6**).

345 One of the most exciting applications of HDM is the ease at which we can perform DMS, a new  
346 technique in protein engineering that uncovers sequence-function relationships. DMS relies on the  
347 construction of saturation mutagenesis libraries, which requires PCR mutagenesis or synthetic genes  
348 and cloning into plasmid expression vectors, thus most DMS studies have been performed in bacteria,  
349 phage, and yeast<sup>25,39,54,55</sup>. One previous example performed DMS on an antibody clone using plasmid  
350 transfection in mammalian cells<sup>56</sup>, however, the transient presence and polyclonality of plasmids make  
351 this a challenging approach. In the case of HDM, we were able to build saturation mutagenesis libraries  
352 for DMS in a similar manner in which we did for affinity maturation, by simply pooling ssODNs with  
353 single degenerate codons tiled along CDRH1, 2, 3. Because the library sizes required for DMS scale  
354 linearly with the number of target positions to investigate, the total library sizes were easily achievable  
355 in our hybridoma cells. Furthermore, because no cloning or plasmid transfection was required, DMS

356 libraries could be built rapidly and easily by HDM and genomic integration ensured cellular  
357 monoclonality. Analysis of the NGS data produced by DMS revealed residues both critical and  
358 detrimental for functional antibody expression and antigen-specificity (**Fig. 5**). This information could be  
359 used to rationally select degenerate codons that mimic the functional sequence landscape, which in  
360 turn can be used to produce combinatorial HDM libraries that can be screened for antibodies with  
361 improved properties (i.e., affinity, specificity, developability). Finally, while in this study we exclusively  
362 focus on antibodies, HDM offers the potential to engineer other valuable biological and cellular  
363 therapeutics that rely on mammalian expression, such as chimeric antigen-receptors, T cell receptors,  
364 cytokine receptors, and intracellular signaling domains<sup>57-60</sup>.

## 365 **METHODS**

### 366 **Hybridoma cell culture conditions**

367 All PnP hybridoma cell lines were cultivated in high-glucose Dulbecco's Modified Eagle Medium  
368 [(DMEM), Thermo Fisher Scientific (Thermo), 11960-044] supplemented with 10% fetal bovine serum  
369 [(FBS), Thermo, 16000-044], 100 U/ml Penicillin/Streptomycin (Thermo, 15140-122), 2 mM Glutamine  
370 (Sigma-Aldrich, G7513), 10 mM HEPES buffer (Thermo, 15630-056) and 50  $\mu$ M 2-mercaptoethanol  
371 (Sigma-Aldrich, M3148). All hybridoma cells were maintained in incubators at a temperature of 37 °C  
372 and 5% CO<sub>2</sub>. Hybridomas were typically maintained in 6 ml of culture in T-25 flasks (TPP, TPP90026),  
373 and passaged every 48/72 hours. All hybridoma cell lines were confirmed annually to be negative for  
374 *Mycoplasma* contamination. A list of all PnP cell lines are described in **Supplementary Table 4**.

### 375 **Guide RNA and ssODN synthesis**

376 For the optimization of parameters or the incorporation of genetic diversity, ssODNs complementary to  
377 the non-target strand were ordered directly from Integrated DNA Technologies (IDT) along with any  
378 PCR primers or gRNAs used in this study. A recent study has suggested that ssODNs complementary  
379 to the non-target strand, and subsequently also complementary to the gRNA, does not compete for  
380 Cas9 binding, but instead anneals to the non-target strand further enhancing HDR events<sup>27</sup>. Modified  
381 ssODNs had phosphorothioate (PS) in the terminal three nt positions of the 5' and 3' ends. A list of all  
382 gRNA, primer, and ssODN donor sequences are provided in **Supplementary Table 5** and  
383 **Supplementary Table 6**.

### 384 **Hybridoma transfection**

385 PnP hybridoma cells were electroporated with the 4D-Nucleofector™ System (Lonza) using the SF Cell  
386 Line 4D-Nucleofector® X Kit L (Lonza, V4XC-2024, V4XC-2032) with the program CQ-104. Cells were  
387 prepared as follows: cells were isolated and centrifuged at 125 x G for 10 minutes, washed with Opti-  
388 MEM® I Reduced Serum Medium (Thermo, 31985-062), and centrifuged again with the same  
389 parameters. The cells were finally re-suspended in SF buffer (per kit manufacturer guidelines), after  
390 which Cas9 plasmid (PX458), Alt-R Cas9 RNP (IDT), or Alt-R gRNA (IDT) and ssODN donor were  
391 added. All experiments performed utilize Cas9 from *Streptococcus pyogenes* (SpCas9). Transfections  
392 for optimization of parameters were performed by transfecting 2x10<sup>5</sup> cells with either 1  $\mu$ g Cas9 plasmid,  
393 100 pmol Alt-R Cas9 RNP, or 115 pmol Alt-R gRNA and 100 pmol ssODN donor in 20  $\mu$ l, 16-well  
394 Nucleocuvette™ strips. All other transfections up to 5x10<sup>6</sup> cells were performed in 100  $\mu$ l single

395 Nucleocuvettes™ and reagents were scaled accordingly. Transfections of  $10^7$  cells were performed  
396 under identical conditions as transfections for  $5 \times 10^6$  cells.

#### 397 **Flow cytometry analysis and sorting**

398 Flow cytometry-based analysis and cell isolation were performed using the BD LSR Fortessa™ and BD  
399 FACS Aria™ III (BD Biosciences), respectively. When labeling was required, cells were washed with  
400 PBS, incubated with the labeling antibody or antigen for 30 minutes on ice, protected from light, washed  
401 again with PBS and analyzed or sorted. The labeling reagents and working concentrations are  
402 described in **Supplementary Table 7**. For cell numbers different from  $10^6$ , the antibody/antigen amount  
403 and incubation volume were adjusted proportionally.

#### 404 **Cell isolation by MACS**

405 MACS isolation of cells was performed using the OctoMACS™ Separator (Miltenyi, 130-042-109) in  
406 combination with MS columns (Miltenyi, 130-042-201) for cell counts up to  $2 \times 10^8$  cells. Cells were  
407 washed with PBS, incubated with the biotinylated antibody or antigen for 30 minutes on ice, washed  
408 twice with PBS, resuspended in PBS and Streptavidin Microbeads (Miltenyi, 130-048-102), and  
409 incubated in the refrigerator for 15 minutes. Following incubation, cells were washed with additional  
410 PBS, and resuspended in 1 ml PBS. The resuspended cells were added to a pre-rinsed magnetic  
411 column, washed twice with 500  $\mu$ l PBS, once with 500  $\mu$ l growth media. Lastly, the column was removed  
412 from the magnetic separator and cells were flushed directly into a collection plate with 1 ml of growth  
413 media.

#### 414 **Measurement of antibody secretion and affinity by ELISA**

415 Sandwich ELISAs were used to measure the secretion of IgG from hybridoma cell lines. Plates were  
416 coated with capture polyclonal antibodies specific for  $V_k$  light chains (goat anti-mouse, Jackson  
417 ImmunoResearch, 115-005-174) concentrated at 4  $\mu$ g/ml in PBS (Thermo, 10010-015). Plates were  
418 then blocked with PBS supplemented with 2% m/v milk (AppliChem, A0830) and 0.05% V/V Tween®-  
419 20 (AppliChem, A1389) (PBSMT). Supernatants from cell culture ( $10^6$  cells/sample, volume normalized  
420 to least concentrated samples) were then serially diluted (at 1:3 ratio) in PBS supplemented with 2%  
421 m/v milk (PBSM). After blocking, supernatants and positive controls were incubated for 1 hour at RT or  
422 O/N at 4°C, followed by 3 washing steps with PBS supplemented with Tween-20 0.05% V/V (PBST). A  
423 secondary HRP-conjugated antibody specific for mouse Fc region was used (goat anti-mouse, Sigma-  
424 Aldrich, A2554), concentrated at 1.7  $\mu$ g/ml in PBSM, followed by 3 wash steps with PBST. ELISA  
425 detection was performed using a 1-Step™ Ultra TMB-ELISA Substrate Solution (Thermo, 34028) as  
426 the HRP substrate, and the reaction was terminated with  $H_2SO_4$  (1M). Absorbance at 450 nm was read  
427 with Infinite® 200 PRO NanoQuant (Tecan).

428 For antigen specificity measurements, plates were coated with purified HEL protein (Sigma-Aldrich,  
429 62971-10G-F) concentrated at 4  $\mu$ g/ml in PBS. Blocking, washing, and supernatant incubation steps  
430 were made analogously to the previously described procedure. A secondary HRP-conjugated antibody  
431 was used specific for  $V_k$  light chain (rat anti-mouse, Abcam, AB99617) concentrated at 0.7  $\mu$ g/ml. ELISA  
432 detection by HRP substrate and absorbance reading was performed as previously stated. ELISA data  
433 was analyzed with the software GraphPad Prism.

#### 434 **Sample preparation for NGS**

435 Sample preparation for NGS was performed similar to the antibody library generation protocol of the  
436 primer extension method described previously<sup>35</sup>. Genomic DNA was extracted from 1-5x10<sup>6</sup> cells using  
437 the Purelink™ Genomic DNA Mini Kit (Thermo, K182001). All extracted genomic DNA was subjected  
438 to a first PCR step. Amplification was performed using a forward primer binding to the beginning of the  
439 VH framework region and a reverse primer specific to the intronic region immediately 3' of the J  
440 segment. PCRs were performed with Q5® High-Fidelity DNA polymerase (NEB, M0491L) in parallel  
441 reaction volumes of 50 µl with the following cycle conditions: 98°C for 30 seconds; 16 cycles of 98°C  
442 for 10 sec, 70°C for 20 sec, 72°C for 30 sec; final extension 72°C for 1 min; 4°C storage. PCR products  
443 were concentrated using DNA Clean and Concentrator (Zymo, D4013) followed by 0.8X SPRIselect  
444 (Beckman Coulter, B22318) left-sided size selection. Total PCR1 product was amplified in a PCR2 step,  
445 which added extension-specific full-length Illumina adapter sequences to the amplicon library. Individual  
446 samples were Illumina-indexed by choosing from 20 different index reverse primers. Cycle conditions  
447 were as follows: 98°C for 30 sec; 2 cycles of 98°C for 10 sec, 40°C for 20 sec, 72°C for 1 min; 6 cycles  
448 of 98°C for 10 sec, 65°C for 20 sec, 72°C for 1 min; 72°C for 5 min; 4°C storage. PCR2 products were  
449 concentrated again with DNA Clean and Concentrator and run on a 1% agarose gel. Bands of  
450 appropriate size (~550bp) were gel-purified using the Zymoclean™ Gel DNA Recovery kit (Zymo,  
451 D4008). Concentration of purified libraries were determined by a Nanodrop 2000c spectrophotometer  
452 and pooled at concentrations aimed at optimal read return. The quality of the final sequencing pool was  
453 verified on a fragment analyzer (Advanced Analytical Technologies) using DNF-473 Standard  
454 Sensitivity NGS fragment analysis kit. All samples passing quality control were sequenced. Antibody  
455 library pools were sequenced on the Illumina MiSeq platform using the reagent kit v3 (2x300 cycles,  
456 paired-end) with 10% PhiX control library. Base call quality of all samples was in the range of a mean  
457 Phred score of 34.

#### 458 **Bioinformatics analysis and graphics**

459 The MiXCR v2.0.3 program was used to perform data pre-processing of raw FASTQ files<sup>61</sup>. Sequences  
460 were aligned to a custom germline gene reference database containing the known sequence  
461 information of the V and J regions for the variable heavy chain of the HEL23-2A synthetic antibody  
462 gene. Clonotype formation by CDRH3 and error correction were performed as described by Bolotin et  
463 al<sup>61</sup>. Functional clonotypes were discarded if: 1) a duplicate CDRH3 amino acid sequence arising from  
464 MiXCR uncorrected PCR errors, or 2) a clone count equal to one. Downstream analysis was performed  
465 using R v3.2.2<sup>62</sup> and Python v2.7.13<sup>63</sup>. Graphics were generated using the R packages ggplot2<sup>64</sup>,  
466 RColorBrewer<sup>65</sup>, and ggseqlogo<sup>66</sup>.

#### 467 **Codon Selection for Library Design**

468 We aimed at designing a library of immunological relevance by investigating all 3,375 degenerate codon  
469 schemes with regard to every possible combination described by the IUPAC nucleotide codes. To this  
470 end, the a.a. frequencies of each degenerate codon scheme were calculated by dividing the number of  
471 codons that encode for a specific a.a. by the total number of codons encoded for a given degenerate  
472 scheme. The a.a. frequencies per position of the CDRH3 found in the murine naïve antibody repertoire

473 were based on NGS datasets of  $V_H$  genes from sorted naïve B-cells, 433,618 unique CDHR3  
474 sequences from 19 C57BL/6 mice, described previously in Greiff et al.<sup>23</sup>. Due to the canonically high  
475 frequencies of 'CAR' and 'YW' residues at the beginning and end of the CDRH3 (Kabat numbering  
476 positions 104-106 and 117-118), these positions were kept constant. Utilizing *Equation 1*, an optimized  
477 degenerate codon per a.a. position can be determined by calculating the MSE of each degenerate  
478 codon relative to the naïve repertoire and then selecting the scheme with the minimum MSE.

479 (Eq. 1) 
$$\text{Optimized Codon} = \arg \min_x \left( \frac{1}{n} \sum_{i=1}^n w_n (Y_{n,\text{deg}} - Y_{n,\text{target}})^2 \right)$$

480 Where  $x$  is the degenerate codon,  $n$  is the number of a.a. (20),  $w_n$  is the a.a. weighting factor depending  
481 on each a.a.'s frequency in the target,  $Y_{n,\text{deg}}$  is the a.a. frequency of the degenerate codon, and  $Y_{n,\text{target}}$   
482 is the a.a. frequency of the target, in this case, the mouse naïve antibody repertoire. To obtain a  
483 measure of the overall similarity for the combination of degenerate codons for a CDRH3 of a given  
484 length, the mean of each position's MSE was also calculated.

#### 485 **Calculating the diversity profiles of libraries**

486 The diversity profile of a given library was calculated as previously described<sup>37</sup>. Briefly, we calculated  
487 Hill diversity for  $\alpha = 0$  to  $\alpha = 10$  by steps of 0.2 according to *Equation 2*,

488 (Eq. 2) 
$${}^\alpha D(f) = \left( \sum_{i=1}^n f_i^\alpha \right)^{\frac{1}{1-\alpha}}$$

489 where  $f_i$  is the clonal frequency of clone  $i$ ,  $n$  is the total number of clones, and  $\alpha$ -values represent  
490 weights. Diversities calculated at alpha values of 0, 1, and 2 represent the species richness, Shannon  
491 Diversity, and the exponential inverse Simpson's Index respectively. Clonal sequences were excluded  
492 from the diversity calculation if: 1) a stop codon was present, or 2) the coding sequence was out of  
493 frame. A clone was defined based on the exact a.a. sequence of the CDRH3.

#### 494 **Calculating Levenshtein (edit) distances**

495 From each of the NGS datasets of NRO, NNK, and NNB libraries, 5,000 CDRH3 sequences of length  
496 14 a.a were randomly sampled. Subsequently, for each sampled sequence, the naïve repertoire utilized  
497 to develop the NRO degenerate codon scheme was searched for presence of CDRH3 a.a. sequences  
498 of Levenshtein (edit) distances 0-6 (**Fig. 3c**).

#### 499 **Calculation of enrichment ratios (ERs) in DMS**

500 The ERs of a given variant was calculated according to previous methods<sup>39</sup>. Clonal frequencies of  
501 variants enriched for antigen specificity by FACS,  $f_{i,\text{Ag}+}$ , were divided by the clonal frequencies of the  
502 variants present in the original library,  $f_{i,\text{Ab}+}$ , according to Equation 3.

503 (Eq. 3) 
$$\text{ER} = \frac{f_{i,\text{Ag}+}}{f_{i,\text{Ab}+}}$$

504 A minimum value of -2 was designated to variants with  $\log[\text{ER}]$  values less than or equal -2 and variants  
505 not present in the dataset were disregarded in the calculation. A clone was defined based on the exact  
506 a.a. sequence of the CDRH3.

## 507 References

- 508 1. Jain, T. *et al.* Biophysical properties of the clinical-stage antibody landscape. *Proc. Natl. Acad. Sci.*  
509 **114**, 944–949 (2017).
- 510 2. Hoogenboom, H. R. Selecting and screening recombinant antibody libraries. *Nat. Biotechnol.* **23**,  
511 1105–1116 (2005).
- 512 3. Feldhaus, M. J. *et al.* Flow-cytometric isolation of human antibodies from a nonimmune  
513 *Saccharomyces cerevisiae* surface display library. *Nat. Biotechnol.* **21**, 163–170 (2003).
- 514 4. Köhler, G. & Milstein, C. Continuous cultures of fused cells secreting antibody of predefined  
515 specificity. *Nature* **256**, 495–497 (1975).
- 516 5. McCafferty, J., Griffiths, A. D., Winter, G. & Chiswell, D. J. Phage antibodies: filamentous phage  
517 displaying antibody variable domains. *Nature* **348**, 552–554 (1990).
- 518 6. Hanes, J., Jermutus, L., Weber-Bornhauser, S., Bosshard, H. R. & Plückthun, A. Ribosome display  
519 efficiently selects and evolves high-affinity antibodies in vitro from immune libraries. *Proc. Natl.*  
520 *Acad. Sci.* **95**, 14130–14135 (1998).
- 521 7. Doerner, A., Rhiel, L., Zielonka, S. & Kolmar, H. Therapeutic antibody engineering by high efficiency  
522 cell screening. *FEBS Lett.* **588**, 278–287 (2014).
- 523 8. Mazor, Y., Blarcom, T. V., Mabry, R., Iverson, B. L. & Georgiou, G. Isolation of engineered, full-  
524 length antibodies from libraries expressed in *Escherichia coli*. *Nat. Biotechnol.* **25**, 563–565 (2007).
- 525 9. Beerli, R. R. *et al.* Isolation of human monoclonal antibodies by mammalian cell display. *Proc. Natl.*  
526 *Acad. Sci.* **105**, 14336–14341 (2008).
- 527 10. Waldmeier, L. *et al.* Transpo-mAb display: Transposition-mediated B cell display and functional  
528 screening of full-length IgG antibody libraries. *mAbs* **8**, 726–740 (2016).
- 529 11. Bowers, P. M. *et al.* Coupling mammalian cell surface display with somatic hypermutation for the  
530 discovery and maturation of human antibodies. *Proc. Natl. Acad. Sci.* **108**, 20455–20460 (2011).
- 531 12. Black, J. B., Perez-Pinera, P. & Gersbach, C. A. Mammalian Synthetic Biology: Engineering  
532 Biological Systems. *Annu. Rev. Biomed. Eng.* **19**, 249–277 (2017).
- 533 13. Findlay, G. M., Boyle, E. A., Hause, R. J., Klein, J. C. & Shendure, J. Saturation editing of genomic  
534 regions by multiplex homology-directed repair. *Nature* **513**, 120 (2014).
- 535 14. Ma, L. *et al.* CRISPR-Cas9-mediated saturated mutagenesis screen predicts clinical drug  
536 resistance with improved accuracy. *Proc. Natl. Acad. Sci.* **114**, 11751–11756 (2017).
- 537 15. Matreyek, K. A., Stephany, J. J. & Fowler, D. M. A platform for functional assessment of large  
538 variant libraries in mammalian cells. *Nucleic Acids Res.* **45**, e102–e102 (2017).
- 539 16. Pogson, M., Parola, C., Kelton, W. J., Heuberger, P. & Reddy, S. T. Immunogenomic engineering  
540 of a plug-and-(dis)play hybridoma platform. *Nat. Commun.* **7**, 12535 (2016).
- 541 17. Chen, F. *et al.* High-frequency genome editing using ssDNA oligonucleotides with zinc-finger  
542 nucleases. *Nat. Methods* **8**, 753–755 (2011).
- 543 18. Ran, F. A. *et al.* Genome engineering using the CRISPR-Cas9 system. *Nat. Protoc.* **8**, 2281–2308  
544 (2013).
- 545 19. Renaud, J.-B. *et al.* Improved Genome Editing Efficiency and Flexibility Using Modified  
546 Oligonucleotides with TALEN and CRISPR-Cas9 Nucleases. *Cell Rep.* **14**, 2263–2272 (2016).
- 547 20. Li, H. *et al.* Design and specificity of long ssDNA donors for CRISPR-based knock-in. *bioRxiv*  
548 178905 (2017). doi:10.1101/178905
- 549 21. Yoshimi, K. *et al.* ssODN-mediated knock-in with CRISPR-Cas for large genomic regions in zygotes.  
550 *Nat. Commun.* **7**, 10431 (2016).
- 551 22. Mena, M. A. & Daugherty, P. S. Automated design of degenerate codon libraries. *Protein Eng. Des.*  
552 *Sel.* **18**, 559–561 (2005).
- 553 23. Greiff, V. *et al.* Systems Analysis Reveals High Genetic and Antigen-Driven Predetermination of  
554 Antibody Repertoires throughout B Cell Development. *Cell Rep.* **19**, 1467–1478 (2017).

- 555 24. Fowler, D. M. & Fields, S. Deep mutational scanning: a new style of protein science. *Nat. Methods*  
556 **11**, 801–807 (2014).
- 557 25. Whitehead, T. A. *et al.* Optimization of affinity, specificity and function of designed influenza  
558 inhibitors using deep sequencing. *Nat. Biotechnol.* **30**, 543 (2012).
- 559 26. Yang, L. *et al.* Optimization of scarless human stem cell genome editing. *Nucleic Acids Res.* **41**,  
560 9049–9061 (2013).
- 561 27. Richardson, C. D., Ray, G. J., DeWitt, M. A., Curie, G. L. & Corn, J. E. Enhancing homology-  
562 directed genome editing by catalytically active and inactive CRISPR-Cas9 using asymmetric donor  
563 DNA. *Nat. Biotechnol.* **34**, 339–344 (2016).
- 564 28. Kim, S., Kim, D., Cho, S. W., Kim, J. & Kim, J.-S. Highly efficient RNA-guided genome editing in  
565 human cells via delivery of purified Cas9 ribonucleoproteins. *Genome Res.* **24**, 1012–1019 (2014).
- 566 29. Platt, R. J. *et al.* CRISPR-Cas9 Knockin Mice for Genome Editing and Cancer Modeling. *Cell* **159**,  
567 440–455 (2014).
- 568 30. Canny, M. D. *et al.* Inhibition of 53BP1 favors homology-dependent DNA repair and increases  
569 CRISPR–Cas9 genome-editing efficiency. *Nat. Biotechnol.* (2017). doi:10.1038/nbt.4021
- 570 31. Fasth, A. *et al.* Ectopic expression of RAD52 and dn53BP1 improves homology-directed repair  
571 during CRISPR–Cas9 genome editing. *Nat. Biomed. Eng.* **1**, 878 (2017).
- 572 32. Fellouse, F. A. *et al.* High-throughput Generation of Synthetic Antibodies from Highly Functional  
573 Minimalist Phage-displayed Libraries. *J. Mol. Biol.* **373**, 924–940 (2007).
- 574 33. Hoet, R. M. *et al.* Generation of high-affinity human antibodies by combining donor-derived and  
575 synthetic complementarity-determining-region diversity. *Nat. Biotechnol.* **23**, 344–348 (2005).
- 576 34. Xu, J. L. & Davis, M. M. Diversity in the CDR3 Region of VH Is Sufficient for Most Antibody  
577 Specificities. *Immunity* **13**, 37–45 (2000).
- 578 35. Menzel, U. *et al.* Comprehensive Evaluation and Optimization of Amplicon Library Preparation  
579 Methods for High-Throughput Antibody Sequencing. *PLoS ONE* **9**, e96727 (2014).
- 580 36. van Overbeek, M. *et al.* DNA Repair Profiling Reveals Nonrandom Outcomes at Cas9-Mediated  
581 Breaks. *Mol. Cell* **63**, 633–646 (2016).
- 582 37. Greiff, V. *et al.* A bioinformatic framework for immune repertoire diversity profiling enables detection  
583 of immunological status. *Genome Med.* **7**, (2015).
- 584 38. Zhai, W. *et al.* Synthetic Antibodies Designed on Natural Sequence Landscapes. *J. Mol. Biol.* **412**,  
585 55–71 (2011).
- 586 39. Fowler, D. M. *et al.* High-resolution mapping of protein sequence-function relationships. *Nat.*  
587 *Methods* **7**, 741 (2010).
- 588 40. Araya, C. L. & Fowler, D. M. Deep mutational scanning: assessing protein function on a massive  
589 scale. *Trends Biotechnol.* **29**, 435–442 (2011).
- 590 41. Hendel, A. *et al.* Chemically modified guide RNAs enhance CRISPR-Cas genome editing in human  
591 primary cells. *Nat. Biotechnol.* **33**, 985–989 (2015).
- 592 42. Chu, V. T. *et al.* Increasing the efficiency of homology-directed repair for CRISPR-Cas9-induced  
593 precise gene editing in mammalian cells. *Nat. Biotechnol.* **33**, 543–548 (2015).
- 594 43. Hu, J. H. *et al.* Evolved Cas9 variants with broad PAM compatibility and high DNA specificity.  
595 *Nature* (2018). doi:10.1038/nature26155
- 596 44. Zetsche, B. *et al.* Cpf1 Is a Single RNA-Guided Endonuclease of a Class 2 CRISPR-Cas System.  
597 *Cell* **163**, 759–771 (2015).
- 598 45. Donovan, K. F. *et al.* Creation of Novel Protein Variants with CRISPR/Cas9-Mediated Mutagenesis:  
599 Turning a Screening By-Product into a Discovery Tool. *PLOS ONE* **12**, e0170445 (2017).
- 600 46. Canver, M. C. *et al.* *BCL11A* enhancer dissection by Cas9-mediated *in situ* saturating mutagenesis.  
601 *Nature* **527**, 192–197 (2015).

- 602 47. Glanville, J. *et al.* Deep sequencing in library selection projects: what insight does it bring? *Curr.*  
603 *Opin. Struct. Biol.* **33**, 146–160 (2015).
- 604 48. Knappik, A. *et al.* Fully synthetic human combinatorial antibody libraries (HuCAL) based on modular  
605 consensus frameworks and CDRs randomized with trinucleotides<sup>11</sup> Edited by I. A. Wilson. *J. Mol.*  
606 *Biol.* **296**, 57–86 (2000).
- 607 49. Ashraf, M. *et al.* ProxiMAX randomization: a new technology for non-degenerate saturation  
608 mutagenesis of contiguous codons. *Biochem. Soc. Trans.* **41**, 1189–1194 (2013).
- 609 50. Laura Frigotto *et al.* Codon-Precise, Synthetic, Antibody Fragment Libraries Built Using Automated  
610 Hexamer Codon Additions and Validated through Next Generation Sequencing. *Antibodies* **4**, 88–  
611 102 (2015).
- 612 51. Virnekäs, B. *et al.* Trinucleotide phosphoramidites: ideal reagents for the synthesis of mixed  
613 oligonucleotides for random mutagenesis. *Nucleic Acids Res.* **22**, 5600–5607 (1994).
- 614 52. Kosuri, S. & Church, G. M. Large-scale *de novo* DNA synthesis: technologies and applications. *Nat.*  
615 *Methods* **11**, 499–507 (2014).
- 616 53. Lee, C. V. *et al.* High-affinity Human Antibodies from Phage-displayed Synthetic Fab Libraries with  
617 a Single Framework Scaffold. *J. Mol. Biol.* **340**, 1073–1093 (2004).
- 618 54. Koenig, P. *et al.* Mutational landscape of antibody variable domains reveals a switch modulating  
619 the interdomain conformational dynamics and antigen binding. *Proc. Natl. Acad. Sci.* **114**, E486–  
620 E495 (2017).
- 621 55. Wrenbeck, E. E. *et al.* Plasmid-based one-pot saturation mutagenesis. *Nat. Methods* **13**, 928–930  
622 (2016).
- 623 56. Forsyth, C. M. *et al.* Deep mutational scanning of an antibody against epidermal growth factor  
624 receptor using mammalian cell display and massively parallel pyrosequencing. *mAbs* **5**, 523–532  
625 (2013).
- 626 57. Sadelain, M., Rivière, I. & Riddell, S. Therapeutic T cell engineering. *Nature* **545**, 423–431 (2017).
- 627 58. Spangler, J. B., Moraga, I., Mendoza, J. L. & Garcia, K. C. Insights into Cytokine–Receptor  
628 Interactions from Cytokine Engineering. *Annu. Rev. Immunol.* **33**, 139–167 (2015).
- 629 59. Roybal, K. T. & Lim, W. A. Synthetic Immunology: Hacking Immune Cells to Expand Their  
630 Therapeutic Capabilities. *Annu. Rev. Immunol.* **35**, 229–253 (2017).
- 631 60. Kariolis, M. S., Kapur, S. & Cochran, J. R. Beyond antibodies: using biological principles to guide  
632 the development of next-generation protein therapeutics. *Curr. Opin. Biotechnol.* **24**, 1072–1077  
633 (2013).
- 634 61. Bolotin, D. A. *et al.* MiXCR: software for comprehensive adaptive immunity profiling. *Nat. Methods*  
635 **12**, 380–381 (2015).
- 636 62. R. Development Core Team. *R: A Language and Environment for Statistical Computing.* (R  
637 Foundation for Statistical Computing).
- 638 63. van Rossum, G. & Drake, F. L. *The Python Language Reference Manual.* (Network Theory Ltd.,  
639 2011).
- 640 64. Wickham, H. *ggplot2: Elegant Graphics for Data Analysis.* (Springer International Publishing, 2016).
- 641 65. Brewer, C. A., Hatchard, G. W. & Harrower, M. A. ColorBrewer in Print: A Catalog of Color Schemes  
642 for Maps. *Cartogr. Geogr. Inf. Sci.* **30**, 5–32 (2003).
- 643 66. Wagih, O. ggseqlogo: a versatile R package for drawing sequence logos. *Bioinformatics* **33**, 3645–  
644 3647 (2017).
- 645 67. Doench, J. G. *et al.* Rational design of highly active sgRNAs for CRISPR–Cas9–mediated gene  
646 inactivation. *Nat. Biotechnol.* **32**, 1262–1267 (2014).
- 647 68. Makowski, L. & Soares, A. Estimating the diversity of peptide populations from limited sequence  
648 data. *Bioinformatics* **19**, 483–489 (2003).
- 649



## 650 **Data Availability**

651 All cell lines, materials, and relevant data generated in this study are included in this published article  
652 (and its supplementary information files) or are available from the corresponding authors upon  
653 reasonable request.

## 654 **Acknowledgements**

655 We acknowledge the ETH Zurich D-BSSE Single Cell Unit and the ETH Zurich D-BSSE Genomics  
656 Facility for support, in particular, T. Lopes, V. Jäggin, E. Burcklen, and C. Beisel. We also thank P.  
657 Heuberger for assistance with optimization. This work was supported by the Swiss National Science  
658 Foundation (Project #: 31003A\_170110 to S.T.R.); the European Research Council Starting Grant  
659 (Project #: 679403 to S.T.R.); The National Center of Competence in Research (NCCR) Molecular  
660 Systems Engineering (to S.T.R.); the professorship of S.T.R. is supported by an endowment from the  
661 S. Leslie Misrock Foundation.

## 662 **Author Contributions**

663 D.M.M., C.R.W., and S.T.R. developed the methodology; D.M.M. and S.T.R. designed the experiments  
664 and wrote the manuscript; D.M.M., C.P., and S.M.M. performed the experiments; D.M.M. and C.R.W.  
665 analyzed sequencing data; C.P., V.G., and W.J.K. provided scientific guidance.

## 666 **Competing Financial Interests**

667 ETH Zurich has filed for patent protection on the technology described herein, and D.M.M., C.P., W.J.K.,  
668 and S.T.R. are named as co-inventors on this patent (European Patent Application: 16163734.3-1402).

## 670 **Figure Legends**

### 671 **Fig. 1: Optimizing parameters for homology directed repair (HDR)**

672 **a**, An experimental assay developed to measure HDR efficiencies by flow cytometry. Cas9 is used to  
673 knockout antibody expression in the CDRH3 of a PnP hybridoma cell line which originally expressed a  
674 functional antibody targeting the model antigen Hen Egg Lysozyme (HEL). A monoclonal population is  
675 then isolated and used for all other downstream experiments. Cas9 promotes HDR at the CDRH3 in  
676 the presence of a ssODN donor template which contains silent mutations. Cells which undergo HDR  
677 will therefore regain antibody expression specific for HEL. **b**, Flow cytometry plots of the original cell  
678 line, PnP-HEL23 (left), the CDRH3 knockout cell line, PnP-HEL23.FI (middle), and a representative  
679 flow cytometry plot demonstrating the ability of the experimental assay to measure HDR integration  
680 efficiencies. **c**, Optimal conditions for HDR revealed by results from assays examining the parameters:  
681 i) Cas9 delivery method, ii) ssODN length, and iii) phosphorothioate (PS) modifications to ssODNs,  
682 Data presented (mean  $\pm$  sd) is representative of  $n = 2$  independent experiments. **d**, The maximum  
683 achievable HDR efficiency of  $\sim 36\%$  was obtained after combing the optimal parameters (constitutive

684 Cas9, ssODN length 120 with PS modifications) and knocking out expression of the 53BP1 protein  
685 (PnP-HEL23.FS cells used here, see **Fig. 2**).

686

687 **Fig. 2: Generating unbiased libraries with homology-directed mutagenesis (HDM)**

688 **a**, Amino acid frequencies of observed HDM events when generating NNK/B libraries resembles the  
689 theoretical amino acid frequencies, indicating unbiased integration. **b**, A PnP hybridoma cell line was  
690 engineered with an optimized, gRNA target sequence to reduce bias arising from NHEJ/MMEJ events.  
691 The gRNA sequence adheres to nucleotide propensities observed to increase Cas9 activity<sup>67</sup> while  
692 minimizing potential off-target sequences. Following Cas9 cleavage, stop codons encoded on both the  
693 5' and 3' ends of the Cas9 cut-site promote recombination of in-frame stop codons following repair via  
694 NHEJ/MMEJ. These in-frame stop codons show reduced library bias arising from nonrandom repair. **c**,  
695 NGS analysis of the top 10 CDRH3 clones for NNK/B libraries generated from either the frameshift-  
696 indel cell line (PnP-HEL23.FI) or the frameshift-stop cell line (PnP-HEL23.FS). In addition to all in-frame  
697 NHEJ/MMEJ events containing a stop codon, a much lower percentage of cells matching the originating  
698 CDRH3 nucleotide sequence (●) was observed. **d**, Diversity profiles calculated from NGS data for  
699 NNK/B libraries generated from the PnP-HEL23.FI or the PnP-HEL23.FS cell lines. The  $\alpha$  values  
700 represent different weights to the clonal frequency, where  $\alpha = 0$  is the species richness, and  $\alpha = 1$  and  
701  $\alpha = 2$  are two common measures for library diversity known as the Shannon entropy and Simpson's  
702 index, respectively. Both the Shannon entropy ( $\alpha=1$ ) and Simpson's Index ( $\alpha=2$ ) are higher in the case  
703 for libraries generated from the PnP-HEL23.FS cell line, indicating a higher degree of unbiased  
704 diversity. Data presented (mean  $\pm$  sd) is representative of  $n = 4$  experiments.

705

706 **Fig. 3: Naïve Repertoire Optimized (NRO) library design and analysis**

707 **a**, Side-by-side comparisons of the CDRH3 amino acid frequencies found in the naïve antibody  
708 repertoire (NGS data of naïve B cells from mice) and the theoretical NNB and NRO randomization  
709 schemes. **b**, The theoretical and observed averages (from NGS) of the positional mean squared errors  
710 (MSEs) evaluated between the naïve repertoire and degenerate codon libraries across various CDRH3  
711 lengths. The NRO scheme more closely resembles the amino acid frequencies observed in the naïve  
712 antibody repertoire compared to both NNK and NNB schemes. Equivalent average MSEs for both  
713 theoretical and observed amino acid frequencies reflect the accuracy of ssODN synthesis and unbiased  
714 HDM integration preferences. **c**, Levenshtein distances for CDRH3 sequences of length 14 between  
715 the HDM libraries generated with degenerate codon schemes and the naïve antibody repertoire. The  
716 NRO scheme has a higher percentage of CDRH3 sequences with shorter edit distances indicating a  
717 higher degree of overall sequence similarity with the naïve repertoire. **d**, Results from NGS data  
718 displays the ability to control the CDRH3 length distribution of the HDM library from a single transfection.

719 By accounting for differences in integration efficiencies (**Supplementary Fig. 5**), ssODNs of various  
720 lengths were pooled at varying ratios to mimic the length distribution of the naïve antibody repertoire.

721

#### 722 **Fig. 4: HDM library screening for antibody discovery and affinity maturation**

723 **a**, Library generation by HDM coupled with mammalian cell display screening leads to the discovery of  
724 a novel CDRH3 variant, HEL24, for the target antigen, hen egg lysozyme (HEL). Following HDM library  
725 generation with NRO ssODNs, antibody expressing cells (Ab<sup>+</sup>) are isolated by magnetic activated cell  
726 sorting (MACS) and expanded. The library is then screened by MACS for specificity to antigen (Ag<sup>+</sup>),  
727 followed by two rounds of screening by fluorescence activated cell sorting (FACS). A monoclonal  
728 population for downstream characterization was isolated by single-cell sorting, revealing the novel,  
729 variant, HEL24. **b**, Saturation HDM libraries for affinity maturation are created by pooling ssODNs that  
730 tile the mutagenesis site along the CDRH3. **c**, Screening of saturation HDM libraries of HEL23 by FACS  
731 or higher antigen affinity variants, while using IgG staining to normalize for antibody expression.  
732 Monoclonal populations for downstream characterization were isolated by single-cell sorting. **d**, The  
733 original HEL23 and HEL24 sequences and their higher affinity variants. ELISA data confirms secretion  
734 of antigen specific antibodies into the hybridoma supernatant and antigen affinities relative to one  
735 another (**Supplementary Fig. 6**).

736

#### 737 **Fig. 5: Determining antigen-specificity sequence landscapes by deep mutational scanning** 738 **(DMS)**

739 Heat maps and their corresponding sequence logo plots from the results of DMS of all variable heavy  
740 chain CDRs in both the HEL23 (**a**) and HEL24 (**b**) variants reveals positional variance for antigen-  
741 binding is clone specific. Libraries of single point-mutations across all heavy chain CDRs were  
742 integrated into hybridomas by HDM. NGS was then performed on libraries pre- and post-screening for  
743 antigen specificity (**Supplementary Fig. 7, Supplementary Table 3**). Clonal (CDRH3) frequencies of  
744 variants post-screening were divided by clonal frequencies of variants pre-screening to calculate  
745 enrichment ratios (ERs). Sequence logo plots are generated by normalizing all variants with an ER > 1  
746 (or log[ER] > 0).

747

#### 748 **Supplementary Figure Legends**

##### 749 **Supplementary Fig. 1: Creation of a stable hybridoma cell line with constitutive Cas9** 750 **expression**

751 **a**, A constitutive Cas9 expression cassette contains two genes under control of separate promoters.  
752 The first gene encodes for the Cas9-2A-puromycin gene from the plasmid pSpCas9(BB)-2A-Puro  
753 (PX459) and enables expression of the Cas9 protein and the puromycin resistance protein from a single  
754 transcript. The second gene encodes for the fluorescent protein eGFP used in selection of successfully  
755 integrated cassettes. The cassette is integrated into the Rosa26 safe harbor locus of the murine  
756 genome by co-transfection with the plasmid pSpCas9(BB)-2A-GFP (PX458). PX458 and PX459 were  
757 gifts from Feng Zhang (Addgene plasmid #s 48138/48139). **b**, Validation of Cas9 activity by transfecting

758 the PnP-mRuby hybridoma with only a gRNA complex targeting the mRuby gene. Results from flow  
759 cytometry confirms high levels (>90%) of gene knock-out.

760 **Supplementary Fig. 2: Flow cytometry plots for optimizing HDR parameters**

761 Flow cytometry plots testing HDR integration efficiencies of all ssODN lengths by transfecting gRNA  
762 and modified ssODNs into the Cas9-expressing cell line (PnP-HEL23.FI).  $2 \times 10^5$  cells were transfected  
763 in replicates and cultured for a minimum of 7 days post-transfection. On day 7, cells were labeled for  
764 flow cytometry with a fluorescent antibody (AlexaFluor® 488) targeting the constant region of the  
765 antibody heavy chain (IgG2c) and a fluorescent antigen (HEL-AlexaFluor® 647). Data presented is  
766 representative of 1 of 2 replicates.

767 **Supplementary Fig. 3: HDR integration efficiencies when scaling up transfection numbers**

768 Bar graphs based on flow cytometry measurements of HDR integration efficiencies after scaling up  
769 transfection numbers under optimal parameters (Cas9 cell: PnP-HEL23.FI, ssODN length 120 with PS  
770 bonds). Cell counts ranging between  $10^6$  to  $10^7$  were transfected by scaling the amount of reagents  
771 accordingly up to  $5 \times 10^6$  cells (e.g.  $10^6$  cells, 500 pmol gRNA, 500 pmol ssODN donor). The transfection  
772 of  $10^7$  cells was performed under identical conditions as the transfection for  $5 \times 10^6$  cells (e.g.  $10^7$  cells,  
773 2.5 nmol gRNA, 2.5 nmol ssODN donor). Cell counts were taken 6 hours post-transfection. 3 days post-  
774 transfection, cells were labeled for flow cytometry with a fluorescent antibody (AlexaFluor® 488)  
775 targeting the constant region of the antibody heavy chain (IgG2c) and a fluorescent antigen (HEL-  
776 AlexaFluor® 647).

777 **Supplementary Fig. 4: Library design and diversity metrics**

778 **a**, A comparison between standard randomization schemes, NNK and NNB, and the NRO scheme. For  
779 any CDRH3 length (or number of degenerate codons), the NRO scheme has a 0% probability of  
780 introducing a nonsense or cysteine mutation. Reducing this probability leads to a higher likelihood of  
781 producing a functional antibody sequence following HDM. **b**, Although, there is a reduction in the overall  
782 amino acid usage in the NRO scheme, adequate levels of diversity are still maintained, particularly  
783 when considering CDRH3 lengths >15, the average length observed in the natural antibody repertoire  
784 of mice. Diversity calculations are performed according to the equation above the graph as described  
785 by Makowski and Soares<sup>68</sup> where differences in amino acid frequencies are taken into consideration.

786 **Supplementary Fig. 5: Impact of degeneracy length on HDM efficiency**

787 Flow cytometry results for HDM percentages of ssODN donors containing increasing  
788 degeneracy/insertion lengths in order to study its impact on integration efficiencies.  $2 \times 10^5$  cells were  
789 transfected in replicate and cultured for a minimum of 7 days post-transfection. On day 7, cells were  
790 labeled for flow cytometry with a fluorescent antibody (AlexaFluor® 488) targeting the constant region  
791 of the antibody heavy chain (IgG2c) and a fluorescent antigen (HEL-AlexaFluor® 647). Data presented  
792 (mean  $\pm$  sd) is representative of  $n = 2$ .

793 **Supplementary Fig. 6: Antibody secretion and antigen affinity measurements**

794 ELISA data for antibody secretion and antigen (HEL) affinity for the original CDRH3 sequences (HEL23,  
795 HEL24) and the point mutation variants isolated for higher affinity by flow cytometry (**Fig. 4c,d**). Similar

796 secretion profiles indicate a comparable amount of secreted full-length IgG, while difference in antigen  
797 affinity profiles indicates similar or increased antigen affinity for point mutation variants compared to the  
798 parent sequence. Data presented (mean  $\pm$  sd) is representative of n = 2 replicates.

799 **Supplementary Fig. 7: Flow cytometry gating to perform DMS**

800 Flow cytometry plot displaying an example gating strategy to sort cell populations utilized in DMS  
801 experiments.  $10^6$  cells are transfected with a pool of ssODNs containing point mutations tiling along the  
802 entire CDRH3 sequence. Antibody positive (Ab+) cells are isolated as the control library for NGS and  
803 antigen positive (Ag+) cells are isolated as the enriched library for NGS. Samples were prepared for  
804 sequencing according to the protocol provided in the **Online Methods** section (**Supplementary Table**  
805 **3**).

806

807 **Supplementary Table 1: Next generation sequencing (NGS) statistics**

808 NGS statistics for all samples referenced in this study. All sequencing libraries prepared for this study  
809 yielded high read counts sufficient for adequate sequencing depth along with a high percentage of  
810 alignment (>93%).

811 **Supplementary Table 2: Overlap analysis between pilot libraries**

812 Overlap analysis between all 8 NNK/NNB library NGS datasets (**Supplementary Table 1**) indicates  
813 that each library generated by HDM produces a unique set of CDRH3 sequences.

814 **Supplementary Table 3: NGS statistics for DMS studies**

815 NGS statistics for all DMS samples referenced in this study. All sequencing libraries prepared for this  
816 study yielded high read counts sufficient for adequate sequencing depth along with a high percentage  
817 of alignment (>90%).

818 **Supplementary Table 4: Cell lines and descriptions**

819 A summary table providing a brief description of the hybridoma cell lines generated or used in this study.

820 **Supplementary Table 5: gRNA target and primer sequences**

821 A summary table providing the nucleotide sequences of all relevant primers, ssODN donors, and gRNA  
822 target sites referenced in this study.

823 **Supplementary Table 6: ssODN donor sequences**

824 A summary table providing the nucleotide sequences of all relevant ssODN donors referenced in this  
825 study.

826 **Supplementary Table 7: Flow cytometry labeling concentrations**

827 A summary table providing information on the fluorescently labeled antibodies and antigens referenced  
828 in this study along with their working concentrations.

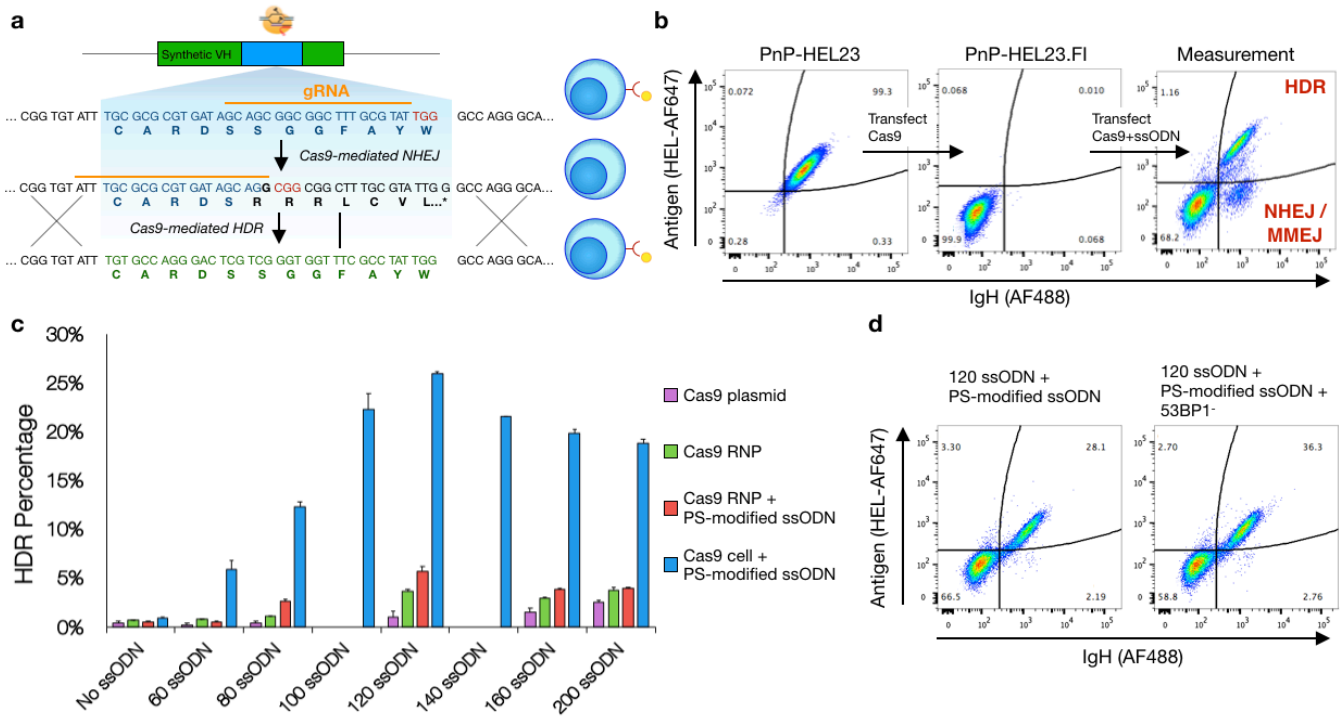

**Fig. 1: Optimizing parameters for homology directed repair (HDR)**

**a**, An experimental assay developed to measure HDR efficiencies by flow cytometry. Cas9 is used to knockout antibody expression in the CDRH3 of a PnP hybridoma cell line which originally expressed a functional antibody targeting the model antigen Hen Egg Lysozyme (HEL). A monoclonal population is then isolated and used for all other downstream experiments. Cas9 promotes HDR at the CDRH3 in the presence of a ssODN donor template which contains silent mutations. Cells which undergo HDR will therefore regain antibody expression specific for HEL. **b**, Flow cytometry plots of the original cell line, PnP-HEL23 (left), the CDRH3 knockout cell line, PnP-HEL23.FI (middle), and a representative flow cytometry plot demonstrating the ability of the experimental assay to measure HDR integration efficiencies. **c**, Optimal conditions for HDR revealed by results from assays examining the parameters: i) Cas9 delivery method, ii) ssODN length, and iii) phosphorothioate (PS) modifications to ssODNs, Data presented (mean±sd) is representative of n = 2 independent experiments. **d**, The maximum achievable HDR efficiency of ~36% was obtained after combining the optimal parameters (constitutive Cas9, ssODN length 120 with PS modifications) and knocking out expression of the 53BP1 protein (PnP-HEL23.FS cells used here, see Fig. 2).

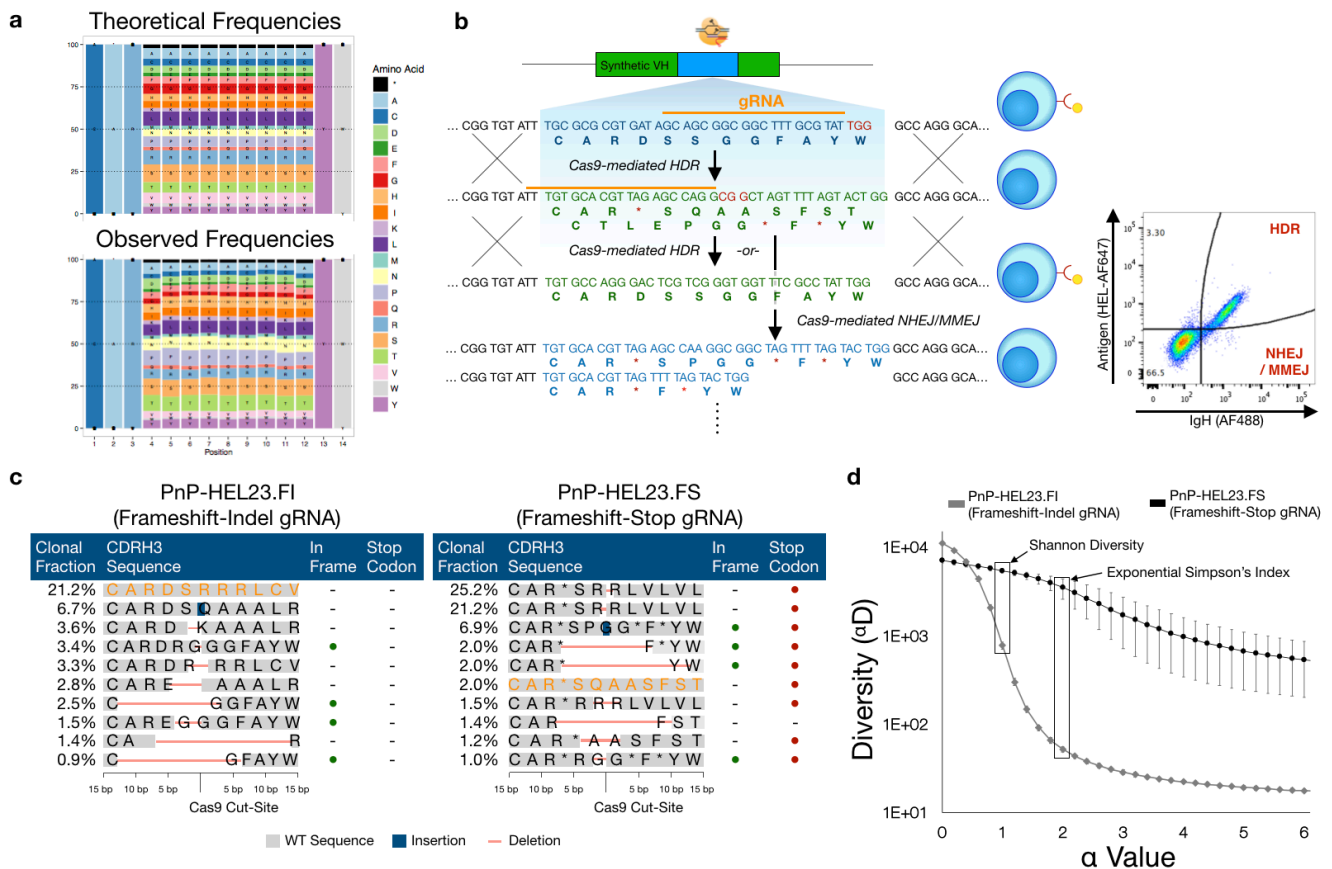

**Fig. 2: Generating unbiased libraries with homology-directed mutagenesis (HDM)**

**a**, Amino acid frequencies of observed HDM events when generating NNK/B libraries resembles the theoretical amino acid frequencies, indicating unbiased integration. **b**, A PnP hybridoma cell line was engineered with an optimized, gRNA target sequence to reduce bias arising from NHEJ/MMEJ events. The gRNA sequence adheres to nucleotide propensities observed to increase Cas9 activity<sup>6763</sup> while minimizing potential off-target sequences. Following Cas9 cleavage, stop codons encoded on both the 5' and 3' ends of the Cas9 cut-site promote recombination of in-frame stop codons following repair via NHEJ/MMEJ. These in-frame stop codons show reduced library bias arising from nonrandom repair. **c**, NGS analysis of the top 10 CDRH3 clones for NNK/B libraries generated from either the frameshift-indel cell line (PnP-HEL23.FI) or the frameshift-stop cell line (PnP-HEL23.FS). In addition to all in-frame NHEJ/MMEJ events containing a stop codon, a much lower percentage of cells matching the originating CDRH3 nucleotide sequence (●) was observed. **d**, Diversity profiles calculated from NGS data for NNK/B libraries generated from the PnP-HEL23.FI or the PnP-HEL23.FS cell lines. The  $\alpha$  values represent different weights to the clonal frequency, where  $\alpha = 0$  is the species richness, and  $\alpha = 1$  and  $\alpha = 2$  are two common measures for library diversity known as the Shannon entropy and Simpson's index, respectively. Both the Shannon entropy ( $\alpha = 1$ ) and Simpson's Index ( $\alpha = 2$ ) are higher in the case for libraries generated from the PnP-HEL23.FS cell line, indicating a higher degree of unbiased diversity. Data presented (mean $\pm$ sd) is representative of  $n = 4$  experiments.

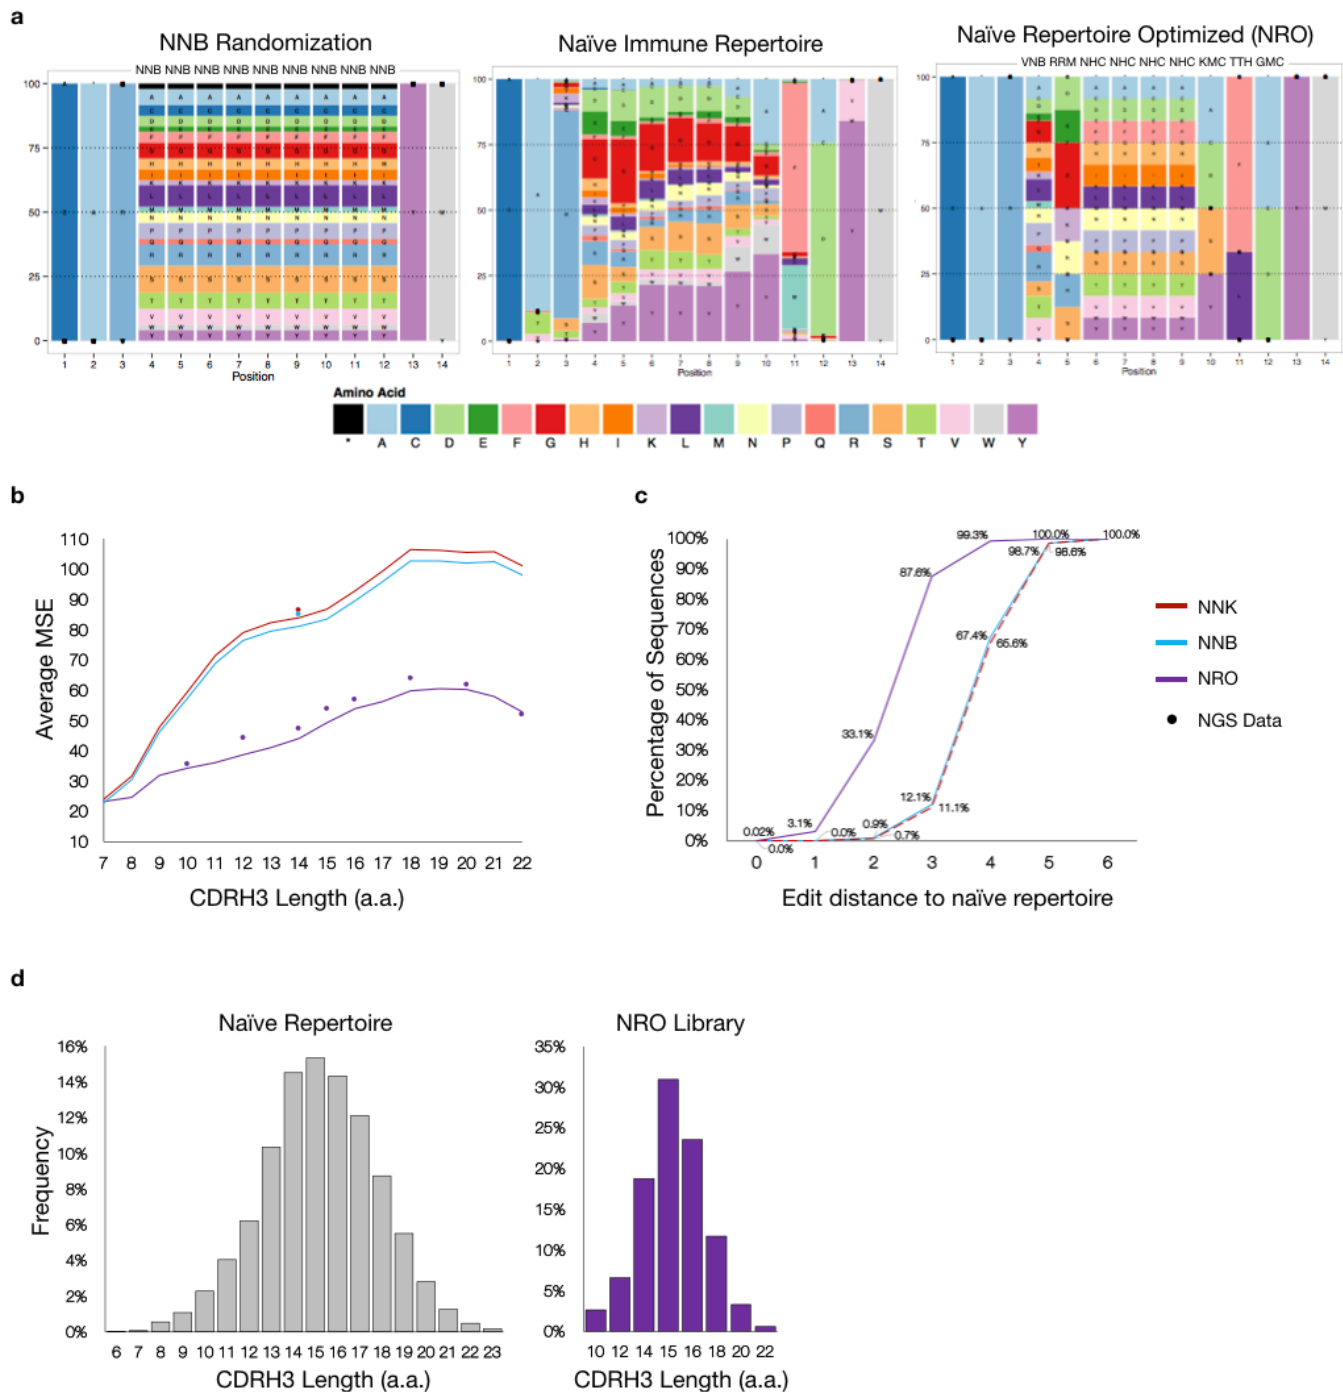

**Fig. 3: Naïve Repertoire Optimized (NRO) library design and analysis**

**a**, Side-by-side comparisons of the CDRH3 amino acid frequencies found in the naïve antibody repertoire (NGS data of naïve B cells from mice) and the theoretical NNB and NRO randomization schemes. **b**, The theoretical and observed averages (from NGS) of the positional mean squared errors (MSEs) evaluated between the naïve repertoire and degenerate codon libraries across various CDRH3 lengths. The NRO scheme more closely resembles the amino acid frequencies observed in the naïve antibody repertoire compared to both NNK and NNB schemes. Equivalent average MSEs for both theoretical and observed amino acid frequencies reflect the accuracy of ssODN synthesis and unbiased HDM integration preferences. **c**, Levenshtein distances for CDRH3 sequences of length 14 between the HDM libraries generated with degenerate codon schemes and the naïve antibody repertoire. The NRO scheme has a higher percentage of CDRH3 sequences with shorter edit distances indicating a higher degree of overall sequence similarity with the naïve repertoire. **d**, Results from NGS data displays the ability to control the CDRH3 length distribution of the HDM library from a single transfection. By accounting for differences in integration efficiencies (**Supplementary Fig. 5**), ssODNs of various lengths were pooled at varying ratios to mimic the length distribution of the naïve antibody repertoire.



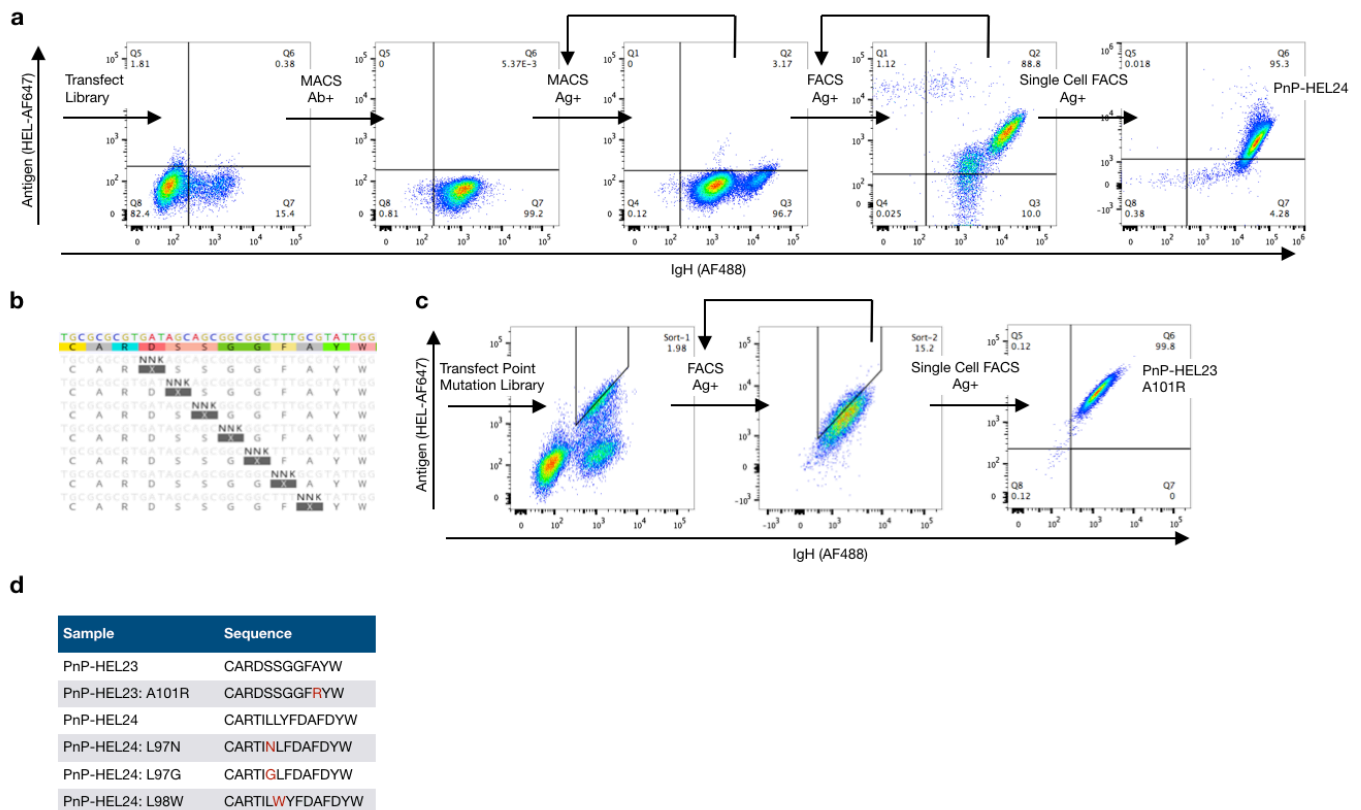

**Fig. 4: HDM library screening for antibody discovery and affinity maturation**

**a**, Library generation by HDM coupled with mammalian cell display screening leads to the discovery of a novel CDRH3 variant, HEL24, for the target antigen, hen egg lysozyme (HEL). Following HDM library generation with NRO ssODNs, antibody expressing cells (Ab<sup>+</sup>) are isolated by magnetic activated cell sorting (MACS) and expanded. The library is then screened by MACS for specificity to antigen (Ag<sup>+</sup>), followed by two rounds of screening by fluorescence activated cell sorting (FACS). A monoclonal population for downstream characterization was isolated by single-cell sorting, revealing the novel, variant, HEL24. **b**, Saturation HDM libraries for affinity maturation are created by pooling ssODNs that tile the mutagenesis site along the CDRH3. **c**, Screening of saturation HDM libraries of HEL23 by FACS for higher antigen affinity variants, while using IgG staining to normalize for antibody expression. Monoclonal populations for downstream characterization were isolated by single-cell sorting. **d**, The original HEL23 and HEL24 sequences and their higher affinity variants. ELISA data confirms secretion of antigen specific antibodies into the hybridoma supernatant and antigen affinities relative to one another (**Supplementary Fig. 6**).

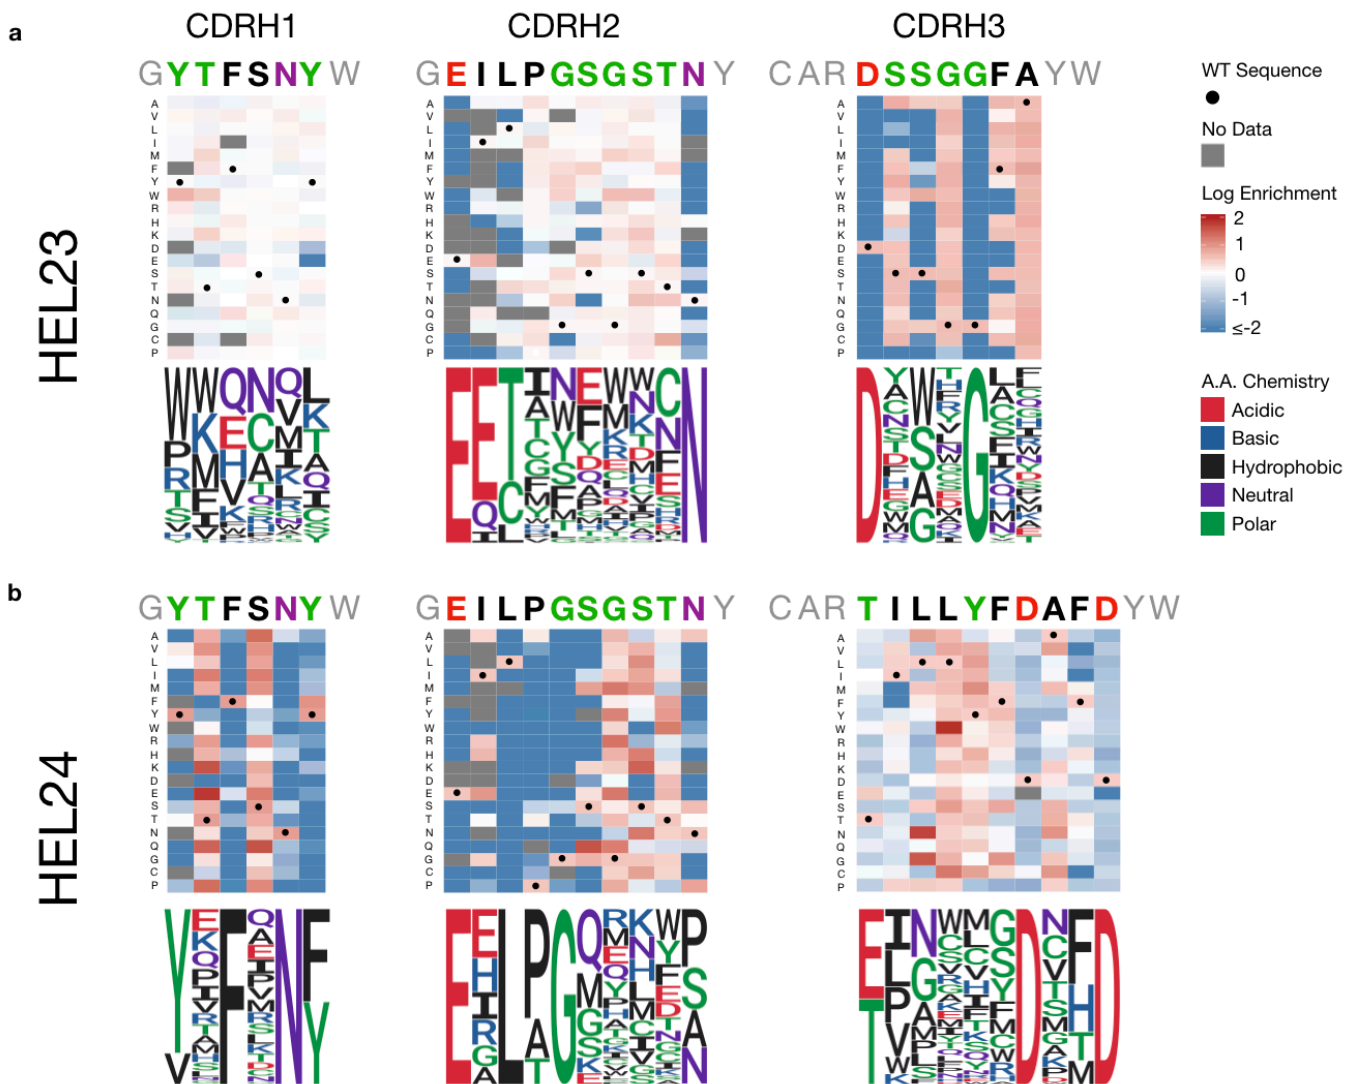

**Fig. 5: Determining antigen-specificity sequence landscapes by deep mutational scanning (DMS)**

Heat maps and their corresponding sequence logo plots from the results of DMS of all variable heavy chain CDRs in both the HEL23 (**a**) and HEL24 (**b**) variants reveals positional variance for antigen-binding is clone specific. Libraries of single point-mutations across all heavy chain CDRs were integrated into hybridomas by HDM. NGS was then performed on libraries pre- and post-screening for antigen specificity (**Supplementary Fig. 7, Supplementary Table 3**). Clonal (CDRH3) frequencies of variants post-screening were divided by clonal frequencies of variants pre-screening to calculate enrichment ratios (ERs). Sequence logo plots are generated by normalizing all variants with an ER > 1 (or  $\log[\text{ER}] > 0$ ).
